# Supplementary material for: Biomarkers of Response to Low-Dose Aspirin in Familial Adenomatous Polyposis Patients
Source: MDPI journal article supplement (doi:10.3390/cancers15092457), 2023-04-25
Supplement: s1 [file s1]

## **Supplementary Material**

### **Biomarkers of response to low-dose Aspirin in Familial Adenomatous Polyposis patients**

Angel Lanas, Stefania Tacconelli, Annalisa Contursi, Elena Piazzuelo, Annalisa Bruno, Maurizio Ronci, Simone Marcone, Melania Dovizio, Federico Sopena, Lorenza Falcone, Cristina Milillo, Matteo Mucci, Patrizia Ballerini, Paola Patrignani

## **Supplementary Methods**

### **Clinical study**

#### ***Study design***

**Day 0 (baseline visit).** Following confirmation of each patient's suitability for the study (based on inclusion criteria and absence of exclusion criteria), patients were invited to participate in the study; after signing informed consent, the following procedures were performed:

- urinary pregnancy test (women of childbearing age were required to have a negative pregnancy test within 24-hour before the first dose of the study drug);
- blood extraction for biochemical and hematological analysis
- medical history and physical examination, including vital signs (blood pressure, heart rate, and lung efficiency);
- delivery of containers for 24-hour urine collections.

**Day 1.** At 8:00 a.m., FAP patients went to the hospital. The patients delivered urine collected in the previous 24 hour. A venous blood sample (30 ml) was taken to conduct some laboratory tests and obtain serum samples for TXB<sub>2</sub> assessment and washed platelets to evaluate COX-1 acetylation. Immediately after, a colonoscopy was performed, and polyps, and normal tissue of the rectum, left and right colon were collected; they were washed in phosphate buffer solution, immediately placed into a tube, frozen in liquid nitrogen, and stored at -80°C until

analysis. Then, the patient took an Aspirin tablet [100 mg, enteric-coated(EC) formulation, Adiro, Bayer] under fasting conditions. A box with 89 Aspirin tablets was provided to each patient. Serum samples, washed platelets, and urine samples were stored at -80°C before the assessment of biomarkers.

**Day 2 to Day 89.** At 8:00 a.m., each patient took the Aspirin tablet at home under fasting conditions.

**Day 90.** At 8:00 a.m., FAP patients took the last Aspirin tablet at home under fasting conditions and started the 24-hour urine collection.

**Day 91 (Visit 2).** FAP patients returned to the clinic with a 24-hour urine collection, and a venous blood sample (30 ml) was taken to obtain serum samples and washed platelets; moreover, colorectal biopsies of normal mucosa and colorectal polyps were collected, as described on day 0. Patients returned the box for compliance assessment by tablet counts. Tablet count adherence was 100%, and no enrolled subject was excluded from the study. In addition, compliance was monitored by contacting the subjects by telephone every 2 weeks. The polyps and tissue samples were processed and analyzed by the Laboratories of Pathology of CIBA and the University Clinic Hospital Lozano Blesa (Zaragoza, Spain).

### ***Inclusion and exclusion criteria***

The individuals were included in the study if these criteria were satisfied: i) age 18-65 years; ii) established diagnosis of FAP according to current diagnostic criteria by genotype and phenotype. The exclusion criteria were: i) allergy to Aspirin or other nonsteroidal anti-inflammatory drugs (NSAIDs); ii) previous use of Aspirin, or other NSAIDs, or misoprostol in the previous 30 days and/or anticipated need for these drugs during the study period; iii) pregnant women; iv) breastfeeding; v) other malignancies (excluding CRC or FAP related tumors) diagnosed in the previous five years; vi) severe comorbid conditions, including pulmonary, cardiac (and cardiovascular risk factors), liver or kidney diseases; vii) peptic ulcer

history or any other gastrointestinal disease that could be considered a contraindication for aspirin use without the concomitant use of a proton-pump inhibitor. All individuals should not be smokers.

Patients did not take any medications before enrolment. During the study, only paracetamol was allowed as analgesic drug for not more than 10 days: only 1 patient have assumed paracetamol 1000 mg for 9 days.

### ***Western blot analysis***

Washed platelets, colorectal polyps, and normal tissue samples from the rectum, left, and right colon were obtained as previously described [13, 14]; they were washed in PBS and immediately placed into a tube and frozen in liquid nitrogen. The specimens were stored at -80°C until the analysis. The samples were homogenized as previously reported [13, 14, 51]. The protein concentration of homogenates was assessed by the Bradford method (Bio-Rad, Milan, Italy) and aliquots were loaded onto Sodium Dodecyl SulphatePolyAcrylamide Gel Electrophoresis (SDS-PAGE) (9-15%, depending on the MW of the protein). Separated proteins were transferred to the PVDF membrane (Bio-Rad). The membrane was saturated with 5% non-fat milk solution in Tris-buffered saline-0.1% Tween-20 (TBS-Tween20). COX-2 protein expression of colorectal biopsies and adenomas was assessed by cutting the membranes into two parts at the visible 50 kDa protein molecular weight (MW) marker band. The membranes above the 50 kDa band were incubated with COX-2 monoclonal antibody [Cayman Chemical (item#160112), Denver, Colorado; diluted 1:1000 in TBS-Tween20], while the lower half of the membranes were probed with GAPDH monoclonal antibody [Sigma Aldrich (item#G8795) diluted 1:4000 in TBS-Tween20] overnight at 4°C. Another blot was performed to assess COX-1 protein expression in the same biological samples following the same procedure described above but using COX-1 polyclonal antibodies [Cayman Chemical (item#160108); diluted 1:1000 in TBS-Tween20]; then, the membrane

was washed three times (for 30 minutes) with TBS-Tween20 and then incubated with the GAPDH monoclonal antibody overnight at 4°C. For the assessment of TXS (TXA<sub>2</sub> synthase) protein, the membrane was incubated with primary antibodies [TXA<sub>2</sub> synthase polyclonal antibodies (Cayman Chemical, item#160715; diluted 1:200 in TBS-Tween20, 5% milk)] overnight at 4°C; then, the membrane was washed three times (for 30 minutes) with TBS-Tween20 and then incubated with the GAPDH monoclonal antibody overnight at 4°C.

Another blot was performed to assess TP (TXA<sub>2</sub> receptor) protein; the membrane was incubated with TP polyclonal antibody (Cayman Chemical, item#10004452, diluted 1:200 in TBS-Tween 20, 5% milk)] overnight at 4°C; then, the membrane was washed three times (for 30 minutes) with TBS-Tween20 and then incubated with the GAPDH monoclonal antibody overnight at 4°C.

For the analysis of expression of TXS and TP in platelets, PVDF membranes were incubated with the TP receptor polyclonal antibodies (reported above) overnight at 4°C; then, the membranes were washed three times (for 30 minutes) with TBS-Tween20 and incubated with COX-1 polyclonal antibodies (described above) overnight at 4°C. Finally, to detect the loading control GAPDH, the membranes were washed three times (for 30 minutes) with TBS-Tween20 and then incubated with the GAPDH monoclonal antibody overnight at 4°C.

To detect the specific protein bands, after the incubation with primary antibodies, membranes were washed three times (10 minutes) in TBS-Tween20 and incubated with an appropriate dilution of HRP-conjugated secondary antibodies (for COX-1, TXS, and TP from Sigma, item#A0545; for COX-2 and GAPDH from Calbiochem, item#401253) for 1 hour at room temperature. Following washing, immunoreactive bands were detected by incubation of membranes with ECL reagent (GE Healthcare, Illinois, USA) and scanning using Alliance 1D software (UVITEC, Cambridge, UK) and normalized to the OD (optical density) of GAPDH.

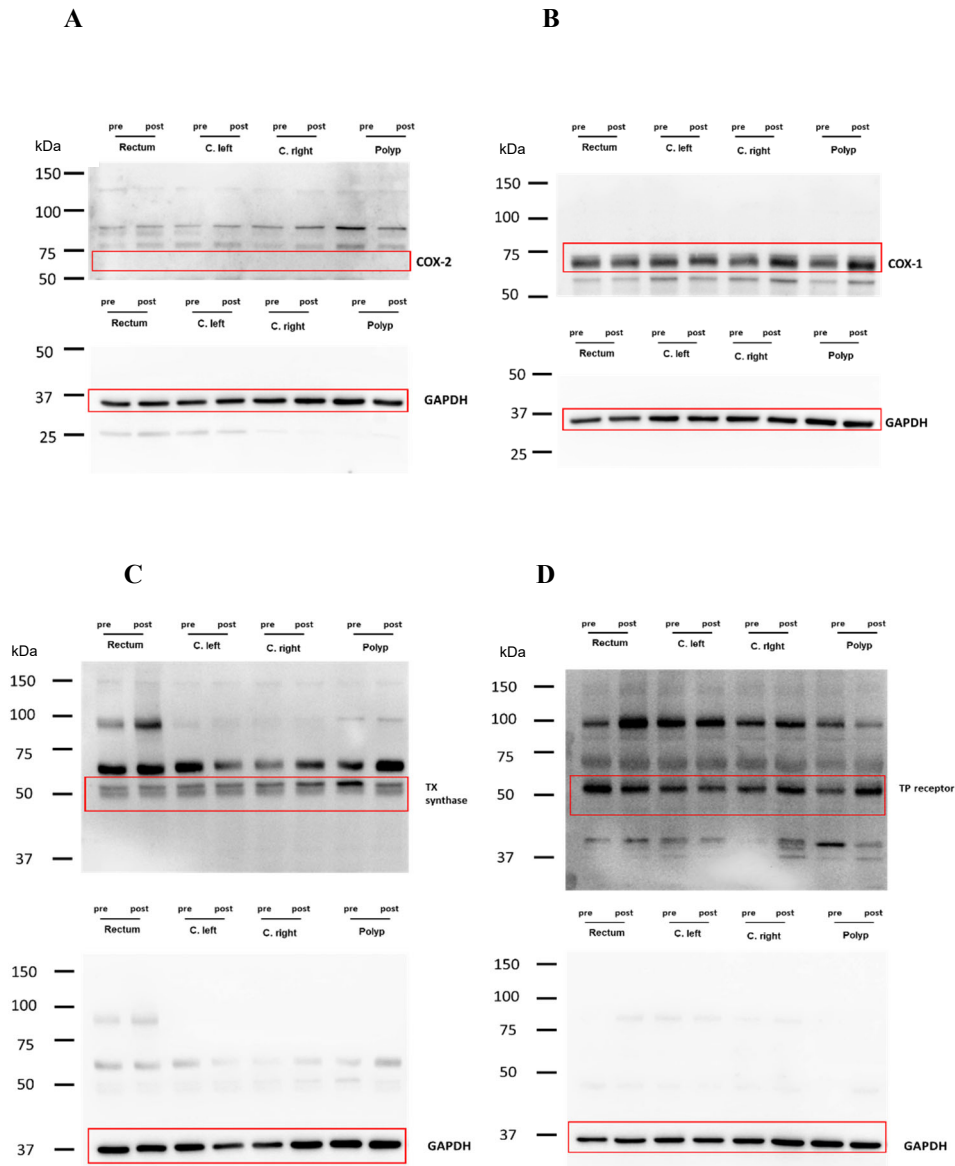

**Figure S1.** Uncropped gels of Western blotting membrane presented in Figure. 4A. **(A, B)** The membranes were cut into two parts at the visible 50 kDa protein MW marker band as described in Supplementary Material. The membranes above 50 kDa protein MW marker band were probed with COX-2 or COX-1 antibodies, while the lower half of the membranes were probed with GAPDH antibodies. **(C, D)** The membranes were probed respectively with a TX synthase antibody or a TP receptor antibody and after an extensive washing the membranes were probed with GAPDH polyclonal antibodies. Some nonspecific bands at higher MW were detected. The red boxes underline the areas presented in Figure 4A.

**A**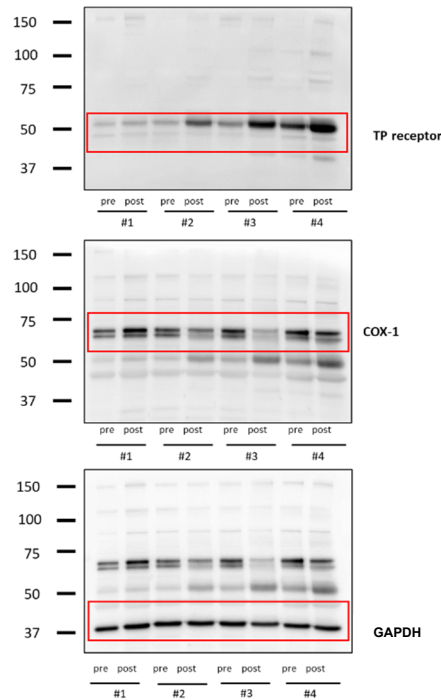**B**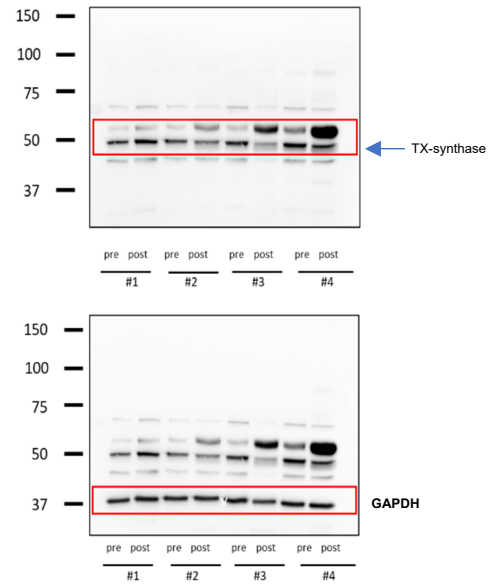

**Figure S2.** Uncropped gels of Western blotting presented in Figure 4B. **(A)** The membranes were probed with a TP receptor monoclonal antibody; after extensive washing, they were incubated with a COX-1 monoclonal antibody and then with a GAPDH polyclonal antibody as reported in Supplementary Material. **(B)** The membranes were incubated with a TX synthase monoclonal antibody and, after extensive washing, were probed with GAPDH polyclonal antibody as reported in Supplementary Material. The red boxes underline the areas presented in Figure 4B. Some nonspecific bands at higher MW were detected. The arrow indicated the protein with appropriate MW (i.e., 50 kDa) of TXS used for OD analysis.

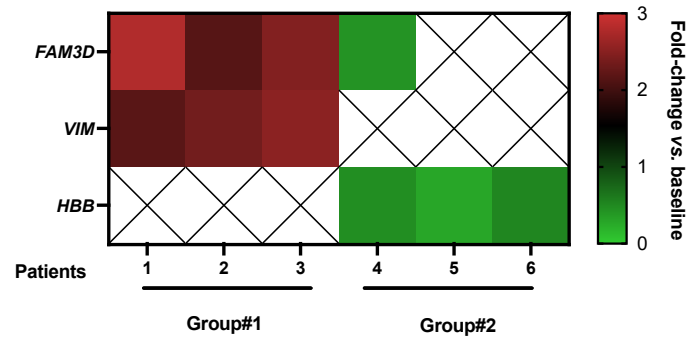

**Figure S3.** Heat map of fold-change of adenoma proteins in six Aspirin-treated FAP patients vs. predrug (baseline). Group#1 and group#2 describe the patients with higher and lower residual urinary 11-dehydro-TXB<sub>2</sub> detected in FAP patients treated with low-dose Aspirin.

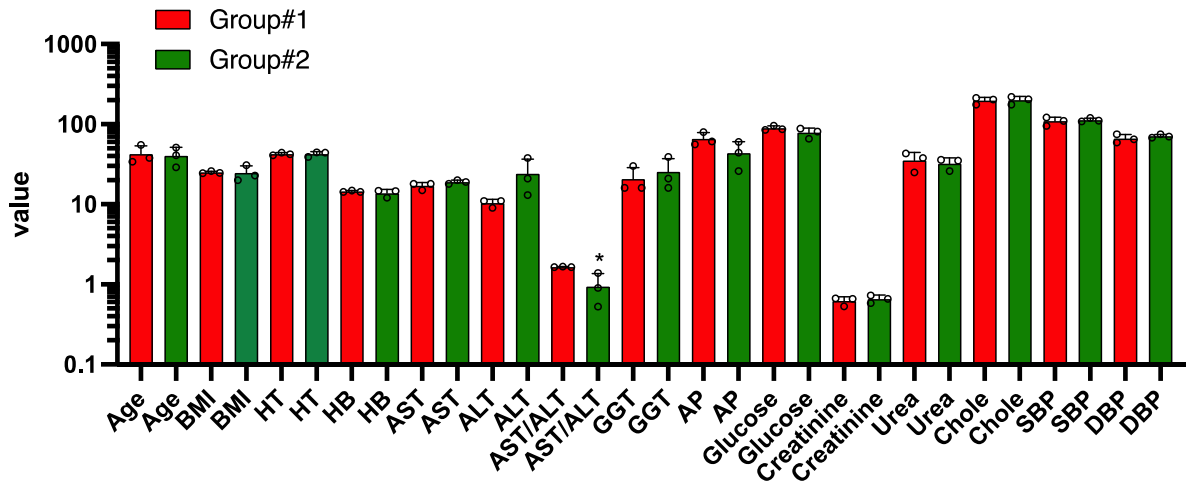

**Figure S4.** Clinical and demographic features of FAP patients with upregulated VIM (group #1) and downregulated HBB (group #2). Values are reported as scatter dot plots with mean+SD, n=3 each group. \*P<0.05 vs. the group#1. A two-tailed Student's test analyzed the 2 sets of data. Abbreviations and unit of measurement: Age (years), Body Mass Index (BMI, kg/m<sup>2</sup>), Hematocrit (HT, %), Hemoglobin (HB, g/dl), Aspartate aminotransferase (AST, U/l), Alanine aminotransferase (ALT, U/l), Gamma-glutamyltransferase (GGT, U/l), Alkaline Phosphatase (AP, U/l), Glucose (mg/dl), Creatinine (mg/dl), Urea (mg/dl), Cholesterol (mg/dl), Systolic blood pressure (SBP, mmHg), Diastolic blood pressure (DBP, mmHg).



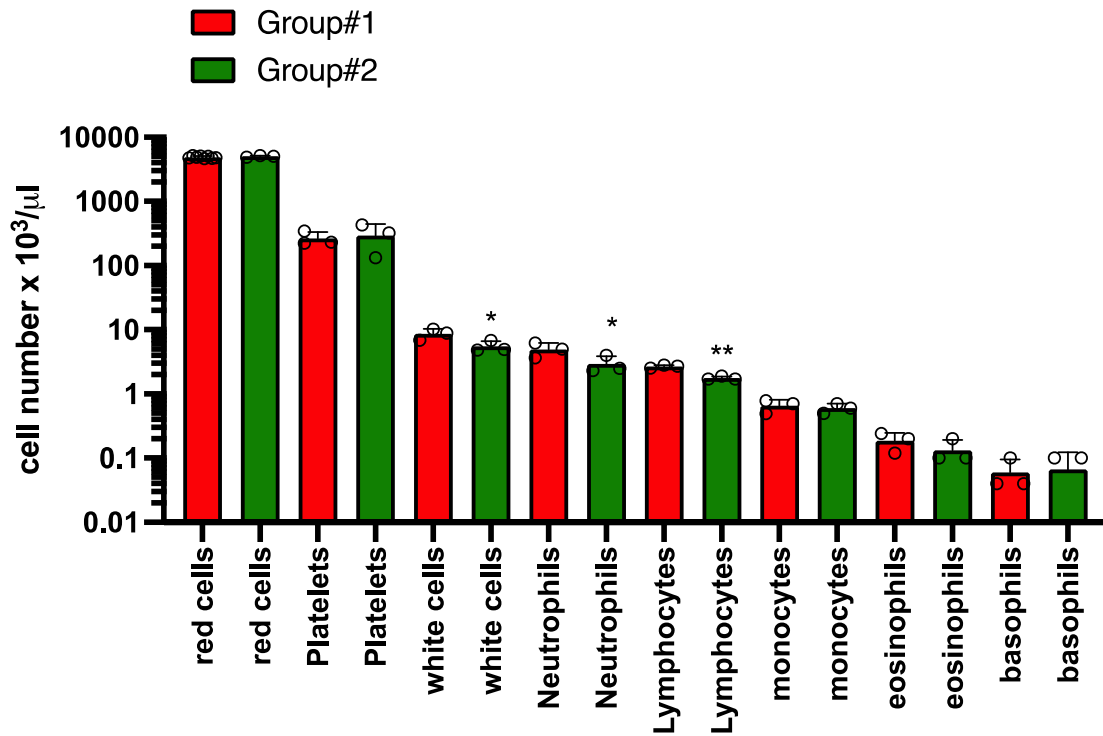

**Figure S5.** Blood cells counted in FAP patients with upregulated VIM (group #1) and downregulated HBB (group #2). Values are reported as scatter dot plots with mean+SD, n=3 each group. \*P<0.05, \*\*P<0.01 vs. the group#1. A two-tailed Student's test analyzed the 2 sets of data.

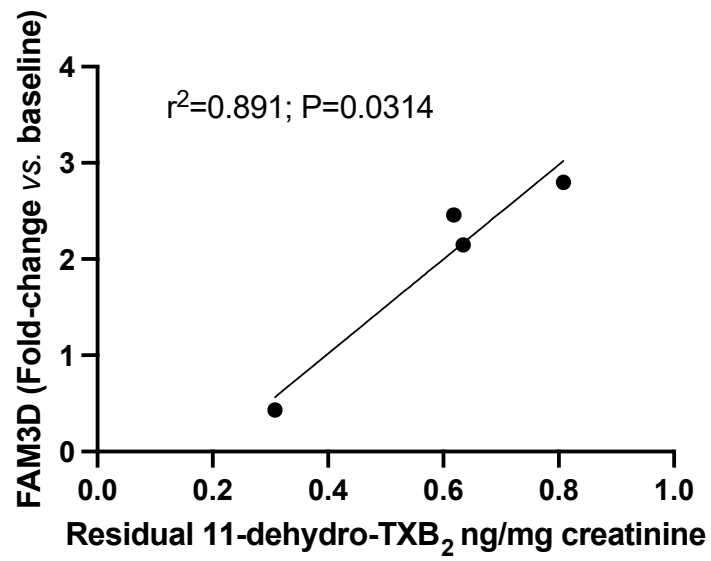

**Figure S6.** Simple linear regression between residual 11-dehydro-TXB<sub>2</sub> and fold-change of colorectal adenoma FAM3D in aspirin-treated FAP patients vs. predrug.

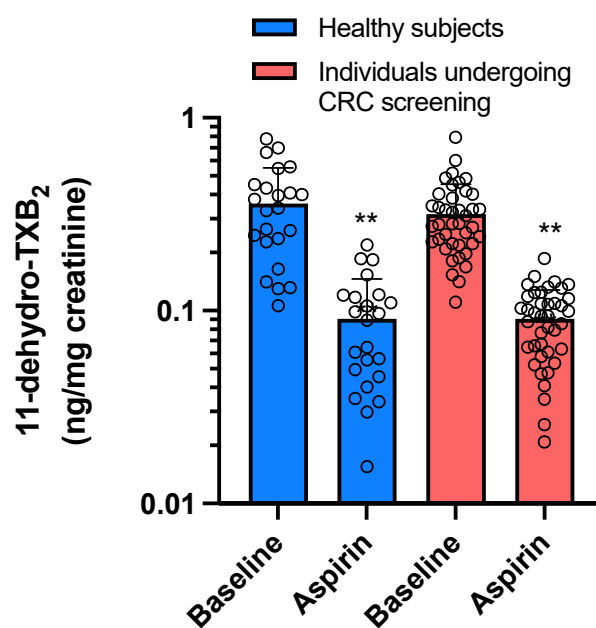

**Figure S7.** Urinary 11-dehydro-TXB<sub>2</sub> in healthy subjects and individuals undergoing CRC screening treated with low-dose Aspirin for a week, previously published [13, 14]. All values are shown as scatter dot plots with mean+SD and analyzed by one-way ANOVA followed by Tukey's multiple comparisons test. \*\*P<0.01 vs. its own baseline.

**Table S1. List of all identified proteins in tissue biopsies from FAP patients**

| <b>Protein ID</b> | <b>David Gene Name</b>                                                                     |
|-------------------|--------------------------------------------------------------------------------------------|
| A1L0T0            | ilvB acetolactate synthase like(ILVBL)                                                     |
| A3KMH1            | von Willebrand factor A domain containing 8(VWA8)                                          |
| A5A3E0            | POTE ankyrin domain family member F(POTEF)                                                 |
| A6H8Y1            | B double prime 1, subunit of RNA polymerase III transcription initiation factor IIIB(BDP1) |
| A6NCM1            | IQ motif containing with AAA domain 1 like(IQCA1L)                                         |
| A6NHG4            | D-dopachrome tautomerase like(DDTL)                                                        |
| A6NIZ1            | RAP1B like (pseudogene)(RAP1BL)                                                            |
| A6NNZ2            | tubulin beta 8B(TUBB8B)                                                                    |
| A8K7I4            | chloride channel accessory 1(CLCA1)                                                        |
| A8MWD9            | small nuclear ribonucleoprotein polypeptide G pseudogene 15(SNRPGP15)                      |
| B2RPK0            | high mobility group box 1 pseudogene 1(HMGB1P1)                                            |
| B5MCN3            | SEC14 like lipid binding 6(SEC14L6)                                                        |
| B5ME19            | eukaryotic translation initiation factor 3 subunit C like(EIF3CL)                          |
| B9A064            | immunoglobulin lambda like polypeptide 5(IGLL5)                                            |
| E7EW31            | proline rich basic protein 1(PROB1)                                                        |
| E9PAV3            | nascent polypeptide associated complex subunit alpha(NACA)                                 |
| I6L899            | golgin A8 family member R(GOLGA8R)                                                         |
| O00115            | deoxyribonuclease 2, lysosomal(DNASE2)                                                     |
| O00148            | DExD-box helicase 39A(DDX39A)                                                              |
| O00151            | PDZ and LIM domain 1(PDLIM1)                                                               |
| O00159            | myosin IC(MYO1C)                                                                           |
| O00182            | galectin 9(LGALS9)                                                                         |
| O00186            | syntaxin binding protein 3(STXBP3)                                                         |
| O00203            | adaptor related protein complex 3 subunit beta 1(AP3B1)                                    |

|        |                                                                                   |
|--------|-----------------------------------------------------------------------------------|
| O00214 | galectin 8(LGALS8)                                                                |
| O00231 | proteasome 26S subunit, non-ATPase 11(PSMD11)                                     |
| O00232 | proteasome 26S subunit, non-ATPase 12(PSMD12)                                     |
| O00264 | progesterone receptor membrane component 1(PGRMC1)                                |
| O00299 | chloride intracellular channel 1(CLIC1)                                           |
| O00303 | eukaryotic translation initiation factor 3 subunit F(EIF3F)                       |
| O00391 | quiescin sulfhydryl oxidase 1(QSOX1)                                              |
| O00423 | EMAP like 1(EML1)                                                                 |
| O00461 | golgi integral membrane protein 4(GOLIM4)                                         |
| O00487 | proteasome 26S subunit, non-ATPase 14(PSMD14)                                     |
| O00534 | von Willebrand factor A domain containing 5A(VWA5A)                               |
| O00571 | DEAD-box helicase 3 X-linked(DDX3X)                                               |
| O00584 | ribonuclease T2(RNASET2)                                                          |
| O00748 | carboxylesterase 2(CES2)                                                          |
| O00754 | mannosidase alpha class 2B member 1(MAN2B1)                                       |
| O00764 | pyridoxal kinase(PDXK)                                                            |
| O14556 | glyceraldehyde-3-phosphate dehydrogenase, spermatogenic(GAPDHS)                   |
| O14579 | COPI coat complex subunit epsilon(COPE)                                           |
| O14617 | adaptor related protein complex 3 subunit delta 1(AP3D1)                          |
| O14647 | chromodomain helicase DNA binding protein 2(CHD2)                                 |
| O14686 | lysine methyltransferase 2D(KMT2D)                                                |
| O14773 | tripeptidyl peptidase 1(TPP1)                                                     |
| O14818 | proteasome 20S subunit alpha 7(PSMA7)                                             |
| O14867 | BTB domain and CNC homolog 1(BACH1)                                               |
| O14974 | protein phosphatase 1 regulatory subunit 12A(PPP1R12A)                            |
| O14979 | heterogeneous nuclear ribonucleoprotein D like(HNRNPDL)                           |
| O14983 | ATPase sarcoplasmic/endoplasmic reticulum Ca <sup>2+</sup> transporting 1(ATP2A1) |
| O15056 | synaptojanin 2(SYNJ2)                                                             |

|        |                                                                        |
|--------|------------------------------------------------------------------------|
| O15090 | zinc finger protein 536(ZNF536)                                        |
| O15127 | secretory carrier membrane protein 2(SCAMP2)                           |
| O15143 | actin related protein 2/3 complex subunit 1B(ARPC1B)                   |
| O15144 | actin related protein 2/3 complex subunit 2(ARPC2)                     |
| O15145 | actin related protein 2/3 complex subunit 3(ARPC3)                     |
| O15213 | WD repeat domain 46(WDR46)                                             |
| O15260 | surfeit 4(SURF4)                                                       |
| O15305 | phosphomannomutase 2(PMM2)                                             |
| O15371 | eukaryotic translation initiation factor 3 subunit D(EIF3D)            |
| O15372 | eukaryotic translation initiation factor 3 subunit H(EIF3H)            |
| O15382 | branched chain amino acid transaminase 2(BCAT2)                        |
| O15400 | syntaxin 7(STX7)                                                       |
| O15511 | actin related protein 2/3 complex subunit 5(ARPC5)                     |
| O15523 | DEAD-box helicase 3 Y-linked(DDX3Y)                                    |
| O15533 | TAP binding protein(TAPBP)                                             |
| O43143 | DEAH-box helicase 15(DHX15)                                            |
| O43252 | 3'-phosphoadenosine 5'-phosphosulfate synthase 1(PAPSS1)               |
| O43324 | eukaryotic translation elongation factor 1 epsilon 1(EEF1E1)           |
| O43390 | heterogeneous nuclear ribonucleoprotein R(HNRNPR)                      |
| O43399 | TPD52 like 2(TPD52L2)                                                  |
| O43432 | eukaryotic translation initiation factor 4 gamma 3(EIF4G3)             |
| O43488 | aldo-keto reductase family 7 member A2(AKR7A2)                         |
| O43491 | erythrocyte membrane protein band 4.1 like 2(EPB41L2)                  |
| O43684 | BUB3 mitotic checkpoint protein(BUB3)                                  |
| O43704 | sulfotransferase family 1B member 1(SULT1B1)                           |
| O43707 | actinin alpha 4(ACTN4)                                                 |
| O43765 | small glutamine rich tetratricopeptide repeat co-chaperone alpha(SGTA) |
| O43776 | asparaginyl-tRNA synthetase 1(NARS1)                                   |

|        |                                                                       |
|--------|-----------------------------------------------------------------------|
| O43852 | calumenin(CALU)                                                       |
| O43865 | adenosylhomocysteinase like 1(AHCYL1)                                 |
| O60218 | aldo-keto reductase family 1 member B10(AKR1B10)                      |
| O60234 | glia maturation factor gamma(GMFG)                                    |
| O60256 | phosphoribosyl pyrophosphate synthetase associated protein 2(PRPSAP2) |
| O60282 | kinesin family member 5C(KIF5C)                                       |
| O60313 | OPA1 mitochondrial dynamin like GTPase(OPA1)                          |
| O60361 | NME2 pseudogene 1(NME2P1)                                             |
| O60488 | acyl-CoA synthetase long chain family member 4(ACSL4)                 |
| O60506 | synaptotagmin binding cytoplasmic RNA interacting protein(SYNCRIP)    |
| O60547 | GDP-mannose 4,6-dehydratase(GMDS)                                     |
| O60656 | UDP glucuronosyltransferase family 1 member A9(UGT1A9)                |
| O60664 | perilipin 3(PLIN3)                                                    |
| O60701 | UDP-glucose 6-dehydrogenase(UGDH)                                     |
| O60716 | catenin delta 1(CTNND1)                                               |
| O60749 | sorting nexin 2(SNX2)                                                 |
| O60763 | USO1 vesicle transport factor(USO1)                                   |
| O60814 | H2B clustered histone 12(H2BC12)                                      |
| O60844 | zymogen granule protein 16(ZG16)                                      |
| O60884 | DnaJ heat shock protein family (Hsp40) member A2(DNAJA2)              |
| O60888 | cutA divalent cation tolerance homolog(CUTA)                          |
| O75083 | WD repeat domain 1(WDR1)                                              |
| O75106 | amine oxidase copper containing 2(AOC2)                               |
| O75131 | copine 3(CPNE3)                                                       |
| O75208 | coenzyme Q9(COQ9)                                                     |
| O75223 | gamma-glutamylcyclotransferase(GGCT)                                  |
| O75323 | nipsnap homolog 2(NIPSNAP2)                                           |
| O75340 | programmed cell death 6(PDCD6)                                        |

|        |                                                                      |
|--------|----------------------------------------------------------------------|
| O75347 | tubulin folding cofactor A(TBCA)                                     |
| O75348 | ATPase H <sup>+</sup> transporting V1 subunit G1(ATP6V1G1)           |
| O75356 | ectonucleoside triphosphate diphosphohydrolase 5 (inactive)(ENTPD5)  |
| O75363 | brain enriched myelin associated protein 1(BCAS1)                    |
| O75367 | macroH2A.1 histone(MACROH2A1)                                        |
| O75368 | SH3 domain binding glutamate rich protein like(SH3BGRL)              |
| O75369 | filamin B(FLNB)                                                      |
| O75380 | NADH:ubiquinone oxidoreductase subunit S6(NDUFS6)                    |
| O75390 | citrate synthase(CS)                                                 |
| O75396 | SEC22 homolog B, vesicle trafficking protein(SEC22B)                 |
| O75431 | metaxin 2(MTX2)                                                      |
| O75436 | VPS26 retromer complex component A(VPS26A)                           |
| O75439 | peptidase, mitochondrial processing subunit beta(PMPCB)              |
| O75477 | ER lipid raft associated 1(ERLIN1)                                   |
| O75489 | NADH:ubiquinone oxidoreductase core subunit S3(NDUFS3)               |
| O75643 | small nuclear ribonucleoprotein U5 subunit 200(SNRNP200)             |
| O75691 | UTP20 small subunit processome component(UTP20)                      |
| O75795 | UDP glucuronosyltransferase family 2 member B17(UGT2B17)             |
| O75828 | carbonyl reductase 3(CBR3)                                           |
| O75874 | isocitrate dehydrogenase (NADP(+)) 1(IDH1)                           |
| O75891 | aldehyde dehydrogenase 1 family member L1(ALDH1L1)                   |
| O75915 | ADP ribosylation factor like GTPase 6 interacting protein 5(ARL6IP5) |
| O75947 | ATP synthase peripheral stalk subunit d(ATP5PD)                      |
| O75964 | ATP synthase membrane subunit g(ATP5MG)                              |
| O94760 | dimethylarginine dimethylaminohydrolase 1(DDAH1)                     |
| O94804 | serine/threonine kinase 10(STK10)                                    |
| O94826 | translocase of outer mitochondrial membrane 70(TOMM70)               |
| O94832 | myosin ID(MYO1D)                                                     |



|        |                                                                       |
|--------|-----------------------------------------------------------------------|
| O94905 | ER lipid raft associated 2(ERLIN2)                                    |
| O94979 | SEC31 homolog A, COPII coat complex component(SEC31A)                 |
| O95154 | aldo-keto reductase family 7 member A3(AKR7A3)                        |
| O95299 | NADH:ubiquinone oxidoreductase subunit A10(NDUFA10)                   |
| O95336 | 6-phosphogluconolactonase(PGLS)                                       |
| O95394 | phosphoglucomutase 3(PGM3)                                            |
| O95571 | ETHE1 persulfide dioxygenase(ETHE1)                                   |
| O95573 | acyl-CoA synthetase long chain family member 3(ACSL3)                 |
| O95678 | keratin 75(KRT75)                                                     |
| O95810 | caveolae associated protein 2(CAVIN2)                                 |
| O95831 | apoptosis inducing factor mitochondria associated 1(AIFM1)            |
| O95834 | EMAP like 2(EML2)                                                     |
| O95861 | 3'(2'), 5'-bisphosphate nucleotidase 1(BPNT1)                         |
| O95865 | dimethylarginine dimethylaminohydrolase 2(DDAH2)                      |
| O95994 | anterior gradient 2, protein disulphide isomerase family member(AGR2) |
| O95996 | APC regulator of WNT signaling pathway 2(APC2)                        |
| O96000 | NADH:ubiquinone oxidoreductase subunit B10(NDUFB10)                   |
| P00325 | alcohol dehydrogenase 1B (class I), beta polypeptide(ADH1B)           |
| P00326 | alcohol dehydrogenase 1C (class I), gamma polypeptide(ADH1C)          |
| P00338 | lactate dehydrogenase A(LDHA)                                         |
| P00352 | aldehyde dehydrogenase 1 family member A1(ALDH1A1)                    |
| P00367 | glutamate dehydrogenase 1(GLUD1)                                      |
| P00387 | cytochrome b5 reductase 3(CYB5R3)                                     |
| P00390 | glutathione-disulfide reductase(GSR)                                  |
| P00403 | mitochondrially encoded cytochrome c oxidase II(MT-CO2)               |
| P00403 | MT-CO2 pseudogene 12(MTCO2P12)                                        |
| P00441 | superoxide dismutase 1(SOD1)                                          |
| P00488 | coagulation factor XIII A chain(F13A1)                                |

|        |                                                           |
|--------|-----------------------------------------------------------|
| P00491 | purine nucleoside phosphorylase(PNP)                      |
| P00505 | glutamic-oxaloacetic transaminase 2(GOT2)                 |
| P00558 | phosphoglycerate kinase 1(PGK1)                           |
| P00738 | haptoglobin(HP)                                           |
| P00915 | carbonic anhydrase 1(CA1)                                 |
| P00918 | carbonic anhydrase 2(CA2)                                 |
| P00966 | argininosuccinate synthase 1(ASS1)                        |
| P01009 | serpin family A member 1(SERPINA1)                        |
| P01023 | alpha-2-macroglobulin(A2M)                                |
| P01024 | complement C3(C3)                                         |
| P01034 | cystatin C(CST3)                                          |
| P01042 | kininogen 1(KNG1)                                         |
| P01591 | joining chain of multimeric IgA and IgM(JCHAIN)           |
| P01594 | immunoglobulin kappa variable 1-33(IGKV1-33)              |
| P01602 | immunoglobulin kappa variable 1-5(IGKV1-5)                |
| P01624 | immunoglobulin kappa variable 3-15(IGKV3-15)              |
| P01714 | immunoglobulin lambda variable 3-19(IGLV3-19)             |
| P01742 | immunoglobulin heavy variable 1-69(IGHV1-69)              |
| P01743 | immunoglobulin heavy variable 1-46(IGHV1-46)              |
| P01762 | immunoglobulin heavy variable 3-11(IGHV3-11)              |
| P01764 | immunoglobulin heavy variable 3-23(IGHV3-23)              |
| P01766 | immunoglobulin heavy variable 3-13(IGHV3-13)              |
| P01833 | polymeric immunoglobulin receptor(PIGR)                   |
| P01834 | immunoglobulin kappa constant(IGKC)                       |
| P01857 | immunoglobulin heavy constant gamma 1 (G1m marker)(IGHG1) |
| P01859 | immunoglobulin heavy constant gamma 2 (G2m marker)(IGHG2) |
| P01860 | immunoglobulin heavy constant gamma 3 (G3m marker)(IGHG3) |
| P01861 | immunoglobulin heavy constant gamma 4 (G4m marker)(IGHG4) |

|        |                                                                  |
|--------|------------------------------------------------------------------|
| P01871 | immunoglobulin heavy constant mu(IGHM)                           |
| P01876 | immunoglobulin heavy constant alpha 1(IGHA1)                     |
| P01877 | immunoglobulin heavy constant alpha 2 (A2m marker)(IGHA2)        |
| P01889 | major histocompatibility complex, class I, B(HLA-B)              |
| P01893 | major histocompatibility complex, class I, H (pseudogene)(HLA-H) |
| P01903 | major histocompatibility complex, class II, DR alpha(HLA-DRA)    |
| P02042 | hemoglobin subunit delta(HBD)                                    |
| P02070 | hemoglobin, beta(HBB)                                            |
| P02533 | keratin 14(KRT14)                                                |
| P02535 | keratin 10(Krt10)                                                |
| P02538 | keratin 6A(KRT6A)                                                |
| P02545 | lamin A/C(LMNA)                                                  |
| P02584 | profilin 1(PFN1)                                                 |
| P02647 | apolipoprotein A1(APOA1)                                         |
| P02671 | fibrinogen alpha chain(FGA)                                      |
| P02675 | fibrinogen beta chain(FGB)                                       |
| P02676 | fibrinogen beta chain(FGB)                                       |
| P02679 | fibrinogen gamma chain(FGG)                                      |
| P02749 | apolipoprotein H(APOH)                                           |
| P02763 | orosomucoid 1(ORM1)                                              |
| P02765 | alpha 2-HS glycoprotein(AHSG)                                    |
| P02768 | albumin(ALB)                                                     |
| P02769 | albumin(ALB)                                                     |
| P02774 | GC vitamin D binding protein(GC)                                 |
| P02786 | transferrin receptor(TFRC)                                       |
| P02787 | transferrin(TF)                                                  |
| P02790 | hemopexin(HPX)                                                   |
| P02795 | metallothionein 2A(MT2A)                                         |

|        |                                                                             |
|--------|-----------------------------------------------------------------------------|
| P04040 | catalase(CAT)                                                               |
| P04066 | alpha-L-fucosidase 1(FUCA1)                                                 |
| P04075 | aldolase, fructose-bisphosphate A(ALDOA)                                    |
| P04080 | cystatin B(CSTB)                                                            |
| P04083 | annexin A1(ANXA1)                                                           |
| P04179 | superoxide dismutase 2(SOD2)                                                |
| P04259 | keratin 6B(KRT6B)                                                           |
| P04264 | keratin 1(KRT1)                                                             |
| P04406 | glyceraldehyde-3-phosphate dehydrogenase(GAPDH)                             |
| P04424 | argininosuccinate lyase(ASL)                                                |
| P04632 | calpain small subunit 1(CAPNS1)                                             |
| P04732 | metallothionein 1E(MT1E)                                                    |
| P04733 | metallothionein 1F(MT1F)                                                    |
| P04746 | amylase alpha 2A(AMY2A)                                                     |
| P04792 | heat shock protein family B (small) member 1(HSPB1)                         |
| P04843 | ribophorin I(RPN1)                                                          |
| P04844 | ribophorin II(RPN2)                                                         |
| P04899 | G protein subunit alpha i2(GNAI2)                                           |
| P04908 | H2A clustered histone 8(H2AC8)                                              |
| P04908 | H2A clustered histone 4(H2AC4)                                              |
| P05023 | ATPase Na <sup>+</sup> /K <sup>+</sup> transporting subunit alpha 1(ATP1A1) |
| P05026 | ATPase Na <sup>+</sup> /K <sup>+</sup> transporting subunit beta 1(ATP1B1)  |
| P05091 | aldehyde dehydrogenase 2 family member(ALDH2)                               |
| P05109 | S100 calcium binding protein A8(S100A8)                                     |
| P05141 | solute carrier family 25 member 5(SLC25A5)                                  |
| P05165 | propionyl-CoA carboxylase subunit alpha(PCCA)                               |
| P05166 | propionyl-CoA carboxylase subunit beta(PCCB)                                |
| P05386 | ribosomal protein lateral stalk subunit P1(RPLP1)                           |

|        |                                                              |
|--------|--------------------------------------------------------------|
| P05387 | ribosomal protein lateral stalk subunit P2(RPLP2)            |
| P05388 | ribosomal protein lateral stalk subunit P0(RPLP0)            |
| P05451 | regenerating family member 1 alpha(REG1A)                    |
| P05455 | small RNA binding exonuclease protection factor La(SSB)      |
| P05556 | integrin subunit beta 1(ITGB1)                               |
| P05783 | keratin 18(KRT18)                                            |
| P05787 | keratin 8(KRT8)                                              |
| P06396 | gelsolin(GSN)                                                |
| P06454 | prothymosin alpha(PTMA)                                      |
| P06576 | ATP synthase F1 subunit beta(ATP5F1B)                        |
| P06702 | S100 calcium binding protein A9(S100A9)                      |
| P06703 | S100 calcium binding protein A6(S100A6)                      |
| P06730 | eukaryotic translation initiation factor 4E(EIF4E)           |
| P06733 | enolase 1(ENO1)                                              |
| P06744 | glucose-6-phosphate isomerase(GPI)                           |
| P06748 | nucleophosmin 1(NPM1)                                        |
| P06753 | tropomyosin 3(TPM3)                                          |
| P06865 | hexosaminidase subunit alpha(HEXA)                           |
| P06899 | H2B clustered histone 11(H2BC11)                             |
| P07108 | diazepam binding inhibitor, acyl-CoA binding protein(DBI)    |
| P07148 | fatty acid binding protein 1(FABP1)                          |
| P07195 | lactate dehydrogenase B(LDHB)                                |
| P07205 | phosphoglycerate kinase 2(PGK2)                              |
| P07237 | prolyl 4-hydroxylase subunit beta(P4HB)                      |
| P07305 | H1.0 linker histone(H1-0)                                    |
| P07327 | alcohol dehydrogenase 1A (class I), alpha polypeptide(ADH1A) |
| P07339 | cathepsin D(CTSD)                                            |
| P07355 | annexin A2(ANXA2)                                            |

|        |                                                               |
|--------|---------------------------------------------------------------|
| P07384 | calpain 1(CAPN1)                                              |
| P07437 | tubulin beta class I(TUBB)                                    |
| P07602 | prosaposin(PSAP)                                              |
| P07686 | hexosaminidase subunit beta(HEXB)                             |
| P07737 | profilin 1(PFN1)                                              |
| P07741 | adenine phosphoribosyltransferase(APRT)                       |
| P07814 | glutamyl-prolyl-tRNA synthetase 1(EPRS1)                      |
| P07858 | cathepsin B(CTSB)                                             |
| P07864 | lactate dehydrogenase C(LDHC)                                 |
| P07900 | heat shock protein 90 alpha family class A member 1(HSP90AA1) |
| P07910 | heterogeneous nuclear ribonucleoprotein C(HNRNPC)             |
| P07919 | ubiquinol-cytochrome c reductase hinge protein(UQCRH)         |
| P07947 | YES proto-oncogene 1, Src family tyrosine kinase(YES1)        |
| P07948 | LYN proto-oncogene, Src family tyrosine kinase(LYN)           |
| P07951 | tropomyosin 2(TPM2)                                           |
| P07954 | fumarate hydratase(FH)                                        |
| P08133 | annexin A6(ANXA6)                                             |
| P08134 | ras homolog family member C(RHOC)                             |
| P08238 | heat shock protein 90 alpha family class B member 1(HSP90AB1) |
| P08559 | pyruvate dehydrogenase E1 subunit alpha 1(PDHA1)              |
| P08574 | cytochrome c1(CYC1)                                           |
| P08670 | vimentin(VIM)                                                 |
| P08708 | ribosomal protein S17(RPS17)                                  |
| P08727 | keratin 19(KRT19)                                             |
| P08754 | G protein subunit alpha i3(GNAI3)                             |
| P08758 | annexin A5(ANXA5)                                             |
| P08779 | keratin 16(KRT16)                                             |
| P08861 | chymotrypsin like elastase 3B(CELA3B)                         |

|        |                                                                                            |
|--------|--------------------------------------------------------------------------------------------|
| P08865 | ribosomal protein SA(RPSA)                                                                 |
| P09012 | small nuclear ribonucleoprotein polypeptide A(SNRPA)                                       |
| P09093 | chymotrypsin like elastase 3A(CELA3A)                                                      |
| P09104 | enolase 2(ENO2)                                                                            |
| P09110 | acetyl-CoA acyltransferase 1(ACAA1)                                                        |
| P09211 | glutathione S-transferase pi 1(GSTP1)                                                      |
| P09327 | villin 1(VIL1)                                                                             |
| P09382 | galectin 1(LGALS1)                                                                         |
| P09429 | high mobility group box 1(HMGB1)                                                           |
| P09467 | fructose-bisphosphatase 1(FBP1)                                                            |
| P09493 | tropomyosin 1(TPM1)                                                                        |
| P09496 | clathrin light chain A(CLTA)                                                               |
| P09525 | annexin A4(ANXA4)                                                                          |
| P09622 | dihydrolipoamide dehydrogenase(DLD)                                                        |
| P09651 | heterogeneous nuclear ribonucleoprotein A1(HNRNPA1)                                        |
| P09669 | cytochrome c oxidase subunit 6C(COX6C)                                                     |
| P09874 | poly(ADP-ribose) polymerase 1(PARP1)                                                       |
| P09960 | leukotriene A4 hydrolase(LTA4H)                                                            |
| P09972 | aldolase, fructose-bisphosphate C(ALDOC)                                                   |
| P0C0S5 | H2A.Z variant histone 1(H2AZ1)                                                             |
| P0C0S8 | H2A clustered histone 17(H2AC17)                                                           |
| P0C0S8 | H2A clustered histone 13(H2AC13)                                                           |
| P0C0S8 | H2A clustered histone 11(H2AC11)                                                           |
| P0C0S8 | H2A clustered histone 15(H2AC15)                                                           |
| P0C0S8 | H2A clustered histone 16(H2AC16)                                                           |
| P0C7P4 | ubiquinol-cytochrome c reductase, Rieske iron-sulfur polypeptide 1 pseudogene 1(UQCRFS1P1) |
| P0CG04 | immunoglobulin lambda constant 1(IGLC1)                                                    |
| P0CG47 | ubiquitin B(UBB)                                                                           |

|        |                                                                                                         |
|--------|---------------------------------------------------------------------------------------------------------|
| P0CG48 | ubiquitin C(UBC)                                                                                        |
| P0DME0 | SET like protein(SETSIP)                                                                                |
| P10155 | Ro60, Y RNA binding protein(RO60)                                                                       |
| P10253 | alpha glucosidase(GAA)                                                                                  |
| P10412 | H1.4 linker histone, cluster member(H1-4)                                                               |
| P10515 | dihydrolipoamide S-acetyltransferase(DLAT)                                                              |
| P10599 | thioredoxin(TXN)                                                                                        |
| P10606 | cytochrome c oxidase subunit 5B(COX5B)                                                                  |
| P10645 | chromogranin A(CHGA)                                                                                    |
| P10768 | esterase D(ESD)                                                                                         |
| P10809 | heat shock protein family D (Hsp60) member 1(HSPD1)                                                     |
| P11021 | heat shock protein family A (Hsp70) member 5(HSPA5)                                                     |
| P11142 | heat shock protein family A (Hsp70) member 8(HSPA8)                                                     |
| P11177 | pyruvate dehydrogenase E1 subunit beta(PDHB)                                                            |
| P11216 | glycogen phosphorylase B(PYGB)                                                                          |
| P11233 | RAS like proto-oncogene A(RALA)                                                                         |
| P11234 | RAS like proto-oncogene B(RALB)                                                                         |
| P11310 | acyl-CoA dehydrogenase medium chain(ACADM)                                                              |
| P11413 | glucose-6-phosphate dehydrogenase(G6PD)                                                                 |
| P11586 | methylenetetrahydrofolate dehydrogenase, cyclohydrolase and formyltetrahydrofolate synthetase 1(MTHFD1) |
| P11678 | eosinophil peroxidase(EPX)                                                                              |
| P11766 | alcohol dehydrogenase 5 (class III), chi polypeptide(ADH5)                                              |
| P11908 | phosphoribosyl pyrophosphate synthetase 2(PRPS2)                                                        |
| P11940 | poly(A) binding protein cytoplasmic 1(PABPC1)                                                           |
| P12004 | proliferating cell nuclear antigen(PCNA)                                                                |
| P12081 | histidyl-tRNA synthetase 1(HARS1)                                                                       |
| P12109 | collagen type VI alpha 1 chain(COL6A1)                                                                  |
| P12111 | collagen type VI alpha 3 chain(COL6A3)                                                                  |



|        |                                                           |
|--------|-----------------------------------------------------------|
| P12235 | solute carrier family 25 member 4(SLC25A4)                |
| P12236 | solute carrier family 25 member 6(SLC25A6)                |
| P12268 | inosine monophosphate dehydrogenase 2(IMPDH2)             |
| P12270 | translocated promoter region, nuclear basket protein(TPR) |
| P12277 | creatine kinase B(CKB)                                    |
| P12429 | annexin A3(ANXA3)                                         |
| P12532 | creatine kinase, mitochondrial 1B(CKMT1B)                 |
| P12532 | creatine kinase, mitochondrial 1A(CKMT1A)                 |
| P12724 | ribonuclease A family member 3(RNASE3)                    |
| P12814 | actinin alpha 1(ACTN1)                                    |
| P12830 | cadherin 1(CDH1)                                          |
| P12955 | peptidase D(PEPD)                                         |
| P12956 | X-ray repair cross complementing 6(XRCC6)                 |
| P13010 | X-ray repair cross complementing 5(XRCC5)                 |
| P13073 | cytochrome c oxidase subunit 4I1(COX4I1)                  |
| P13284 | IFI30 lysosomal thiol reductase(IFI30)                    |
| P13473 | lysosomal associated membrane protein 2(LAMP2)            |
| P13489 | ribonuclease/angiogenin inhibitor 1(RNH1)                 |
| P13611 | versican(VCAN)                                            |
| P13639 | eukaryotic translation elongation factor 2(EEF2)          |
| P13640 | metallothionein 1G(MT1G)                                  |
| P13645 | keratin 10(KRT10)                                         |
| P13647 | keratin 5(KRT5)                                           |
| P13667 | protein disulfide isomerase family A member 4(PDIA4)      |
| P13693 | tumor protein, translationally-controlled 1(TPT1)         |
| P13796 | lymphocyte cytosolic protein 1(LCP1)                      |
| P13798 | acylaminoacyl-peptide hydrolase(APEH)                     |
| P13804 | electron transfer flavoprotein subunit alpha(ETFA)        |

|        |                                                                         |
|--------|-------------------------------------------------------------------------|
| P13861 | protein kinase cAMP-dependent type II regulatory subunit alpha(PRKAR2A) |
| P13929 | enolase 3(ENO3)                                                         |
| P13987 | CD59 molecule (CD59 blood group)(CD59)                                  |
| P14174 | macrophage migration inhibitory factor(MIF)                             |
| P14209 | CD99 molecule (Xg blood group)(CD99)                                    |
| P14314 | protein kinase C substrate 80K-H(PRKCSH)                                |
| P14406 | cytochrome c oxidase subunit 7A2(COX7A2)                                |
| P14550 | aldo-keto reductase family 1 member A1(AKR1A1)                          |
| P14618 | pyruvate kinase M1/2(PKM)                                               |
| P14625 | heat shock protein 90 beta family member 1(HSP90B1)                     |
| P14678 | small nuclear ribonucleoprotein polypeptides B and B1(SNRPB)            |
| P14854 | cytochrome c oxidase subunit 6B1(COX6B1)                                |
| P14866 | heterogeneous nuclear ribonucleoprotein L(HNRNPL)                       |
| P14868 | aspartyl-tRNA synthetase 1(DARS1)                                       |
| P14923 | junction plakoglobin(JUP)                                               |
| P15121 | aldo-keto reductase family 1 member B(AKR1B1)                           |
| P15153 | Rac family small GTPase 2(RAC2)                                         |
| P15259 | phosphoglycerate mutase 2(PGAM2)                                        |
| P15289 | arylsulfatase A(ARSA)                                                   |
| P15311 | ezrin(EZR)                                                              |
| P15374 | ubiquitin C-terminal hydrolase L3(UCHL3)                                |
| P15428 | 15-hydroxyprostaglandin dehydrogenase(HPGD)                             |
| P15531 | NME/NM23 nucleoside diphosphate kinase 1(NME1)                          |
| P15880 | ribosomal protein S2(RPS2)                                              |
| P15924 | desmoplakin(DSP)                                                        |
| P16070 | CD44 molecule (Indian blood group)(CD44)                                |
| P16104 | H2A.X variant histone(H2AX)                                             |
| P16144 | integrin subunit beta 4(ITGB4)                                          |

|        |                                                                                   |
|--------|-----------------------------------------------------------------------------------|
| P16152 | carbonyl reductase 1(CBR1)                                                        |
| P16219 | acyl-CoA dehydrogenase short chain(ACADS)                                         |
| P16278 | galactosidase beta 1(GLB1)                                                        |
| P16401 | H1.5 linker histone, cluster member(H1-5)                                         |
| P16402 | H1.3 linker histone, cluster member(H1-3)                                         |
| P16403 | H1.2 linker histone, cluster member(H1-2)                                         |
| P16422 | epithelial cell adhesion molecule(EPCAM)                                          |
| P16615 | ATPase sarcoplasmic/endoplasmic reticulum Ca <sup>2+</sup> transporting 2(ATP2A2) |
| P16949 | stathmin 1(STMN1)                                                                 |
| P17066 | heat shock protein family A (Hsp70) member 6(HSPA6)                               |
| P17081 | ras homolog family member Q(RHOQ)                                                 |
| P17174 | glutamic-oxaloacetic transaminase 1(GOT1)                                         |
| P17516 | aldo-keto reductase family 1 member C4(AKR1C4)                                    |
| P17655 | calpain 2(CAPN2)                                                                  |
| P17661 | desmin(DES)                                                                       |
| P17844 | DEAD-box helicase 5(DDX5)                                                         |
| P17858 | phosphofructokinase, liver type(PFKL)                                             |
| P17931 | galectin 3(LGALS3)                                                                |
| P17980 | proteasome 26S subunit, ATPase 3(PSMC3)                                           |
| P17987 | t-complex 1(TCP1)                                                                 |
| P18065 | insulin like growth factor binding protein 2(IGFBP2)                              |
| P18085 | ADP ribosylation factor 4(ARF4)                                                   |
| P18124 | ribosomal protein L7(RPL7)                                                        |
| P18206 | vinculin(VCL)                                                                     |
| P18283 | glutathione peroxidase 2(GPX2)                                                    |
| P18669 | phosphoglycerate mutase 1(PGAM1)                                                  |
| P19012 | keratin 15(KRT15)                                                                 |
| P19075 | tetraspanin 8(TSPAN8)                                                             |

|        |                                                                         |
|--------|-------------------------------------------------------------------------|
| P19224 | UDP glucuronosyltransferase family 1 member A6(UGT1A6)                  |
| P19338 | nucleolin(NCL)                                                          |
| P19367 | hexokinase 1(HK1)                                                       |
| P19404 | NADH:ubiquinone oxidoreductase core subunit V2(NDUFV2)                  |
| P19801 | amine oxidase copper containing 1(AOC1)                                 |
| P19827 | inter-alpha-trypsin inhibitor heavy chain 1(ITIH1)                      |
| P19961 | amylase alpha 2B(AMY2B)                                                 |
| P19971 | thymidine phosphorylase(TYMP)                                           |
| P20073 | annexin A7(ANXA7)                                                       |
| P20231 | tryptase beta 2(TPSB2)                                                  |
| P20339 | RAB5A, member RAS oncogene family(RAB5A)                                |
| P20340 | RAB6A, member RAS oncogene family(RAB6A)                                |
| P20618 | proteasome 20S subunit beta 1(PSMB1)                                    |
| P20648 | ATPase H <sup>+</sup> /K <sup>+</sup> transporting subunit alpha(ATP4A) |
| P20671 | H2A clustered histone 7(H2AC7)                                          |
| P20674 | cytochrome c oxidase subunit 5A(COX5A)                                  |
| P20700 | lamin B1(LMNB1)                                                         |
| P20774 | osteoglycin(OGN)                                                        |
| P20794 | male germ cell associated kinase(MAK)                                   |
| P20810 | calpastatin(CAST)                                                       |
| P20933 | aspartylglucosaminidase(AGA)                                            |
| P20962 | parathymosin(PTMS)                                                      |
| P21266 | glutathione S-transferase mu 3(GSTM3)                                   |
| P21281 | ATPase H <sup>+</sup> transporting V1 subunit B2(ATP6V1B2)              |
| P21291 | cysteine and glycine rich protein 1(CSRP1)                              |
| P21333 | filamin A(FLNA)                                                         |
| P21397 | monoamine oxidase A(MAOA)                                               |
| P21399 | aconitase 1(ACO1)                                                       |

|        |                                                                                                                                  |
|--------|----------------------------------------------------------------------------------------------------------------------------------|
| P21796 | voltage dependent anion channel 1(VDAC1)                                                                                         |
| P21926 | CD9 molecule(CD9)                                                                                                                |
| P21964 | catechol-O-methyltransferase(COMT)                                                                                               |
| P21980 | transglutaminase 2(TGM2)                                                                                                         |
| P22102 | phosphoribosylglycinamide formyltransferase, phosphoribosylglycinamide synthetase, phosphoribosylaminoimidazole synthetase(GART) |
| P22234 | phosphoribosylaminoimidazole carboxylase and phosphoribosylaminoimidazolesuccinocarboxamide synthase(PAICS)                      |
| P22307 | sterol carrier protein 2(SCP2)                                                                                                   |
| P22309 | UDP glucuronosyltransferase family 1 member A1(UGT1A1)                                                                           |
| P22310 | UDP glucuronosyltransferase family 1 member A4(UGT1A4)                                                                           |
| P22314 | ubiquitin like modifier activating enzyme 1(UBA1)                                                                                |
| P22392 | NME/NM23 nucleoside diphosphate kinase 2(NME2)                                                                                   |
| P22492 | H1.6 linker histone, cluster member(H1-6)                                                                                        |
| P22607 | fibroblast growth factor receptor 3(FGFR3)                                                                                       |
| P22626 | heterogeneous nuclear ribonucleoprotein A2/B1(HNRNPA2B1)                                                                         |
| P22695 | ubiquinol-cytochrome c reductase core protein 2(UQCRC2)                                                                          |
| P23229 | integrin subunit alpha 6(ITGA6)                                                                                                  |
| P23246 | splicing factor proline and glutamine rich(SFPQ)                                                                                 |
| P23284 | peptidylprolyl isomerase B(PIIB)                                                                                                 |
| P23368 | malic enzyme 2(ME2)                                                                                                              |
| P23381 | tryptophanyl-tRNA synthetase 1(WARS1)                                                                                            |
| P23396 | ribosomal protein S3(RPS3)                                                                                                       |
| P23526 | adenosylhomocysteinase(AHCY)                                                                                                     |
| P23527 | H2B clustered histone 17(H2BC17)                                                                                                 |
| P23528 | cofilin 1(CFL1)                                                                                                                  |
| P23786 | carnitine palmitoyltransferase 2(CPT2)                                                                                           |
| P24298 | glutamic--pyruvic transaminase(GPT)                                                                                              |
| P24534 | eukaryotic translation elongation factor 1 beta 2(EEF1B2)                                                                        |

|        |                                                                                     |
|--------|-------------------------------------------------------------------------------------|
| P24539 | ATP synthase peripheral stalk-membrane subunit b(ATP5PB)                            |
| P24752 | acetyl-CoA acetyltransferase 1(ACAT1)                                               |
| P24941 | cyclin dependent kinase 2(CDK2)                                                     |
| P25325 | mercaptopyruvate sulfurtransferase(MPST)                                            |
| P25398 | ribosomal protein S12(RPS12)                                                        |
| P25685 | DnaJ heat shock protein family (Hsp40) member B1(DNAJB1)                            |
| P25705 | ATP synthase F1 subunit alpha(ATP5F1A)                                              |
| P25774 | cathepsin S(CTSS)                                                                   |
| P25786 | proteasome 20S subunit alpha 1(PSMA1)                                               |
| P25787 | proteasome 20S subunit alpha 2(PSMA2)                                               |
| P25788 | proteasome 20S subunit alpha 3(PSMA3)                                               |
| P25789 | proteasome 20S subunit alpha 4(PSMA4)                                               |
| P25815 | S100 calcium binding protein P(S100P)                                               |
| P26038 | moesin(MSN)                                                                         |
| P26232 | catenin alpha 2(CTNNA2)                                                             |
| P26373 | ribosomal protein L13(RPL13)                                                        |
| P26440 | isovaleryl-CoA dehydrogenase(IVD)                                                   |
| P26447 | S100 calcium binding protein A4(S100A4)                                             |
| P26583 | high mobility group box 2(HMGB2)                                                    |
| P26599 | polypyrimidine tract binding protein 1(PTBP1)                                       |
| P26639 | threonyl-tRNA synthetase 1(TARS1)                                                   |
| P26640 | valyl-tRNA synthetase 1(VARS1)                                                      |
| P26641 | eukaryotic translation elongation factor 1 gamma(EEF1G)                             |
| P26885 | FKBP prolyl isomerase 2(FKBP2)                                                      |
| P27105 | stomatin(STOM)                                                                      |
| P27216 | annexin A13(ANXA13)                                                                 |
| P27348 | tyrosine 3-monooxygenase/tryptophan 5-monooxygenase activation protein theta(YWHAQ) |
| P27635 | ribosomal protein L10(RPL10)                                                        |

|        |                                                               |
|--------|---------------------------------------------------------------|
| P27695 | apurinic/apyrimidinic endodeoxyribonuclease 1(APEX1)          |
| P27797 | calreticulin(CALR)                                            |
| P27816 | microtubule associated protein 4(MAP4)                        |
| P27824 | calnexin(CANX)                                                |
| P28062 | proteasome 20S subunit beta 8(PSMB8)                          |
| P28065 | proteasome 20S subunit beta 9(PSMB9)                          |
| P28066 | proteasome 20S subunit alpha 5(PSMA5)                         |
| P28070 | proteasome 20S subunit beta 4(PSMB4)                          |
| P28072 | proteasome 20S subunit beta 6(PSMB6)                          |
| P28161 | glutathione S-transferase mu 2(GSTM2)                         |
| P28331 | NADH:ubiquinone oxidoreductase core subunit S1(NDUFS1)        |
| P28482 | mitogen-activated protein kinase 1(MAPK1)                     |
| P28799 | granulin precursor(GRN)                                       |
| P28838 | leucine aminopeptidase 3(LAP3)                                |
| P29401 | transketolase(TKT)                                            |
| P29466 | caspase 1(CASP1)                                              |
| P29692 | eukaryotic translation elongation factor 1 delta(EEF1D)       |
| P29966 | myristoylated alanine rich protein kinase C substrate(MARCKS) |
| P30039 | phenazine biosynthesis like protein domain containing(PBLD)   |
| P30040 | endoplasmic reticulum protein 29(ERP29)                       |
| P30041 | peroxiredoxin 6(PRDX6)                                        |
| P30043 | biliverdin reductase B(BLVRB)                                 |
| P30044 | peroxiredoxin 5(PRDX5)                                        |
| P30046 | D-dopachrome tautomerase(DDT)                                 |
| P30048 | peroxiredoxin 3(PRDX3)                                        |
| P30049 | ATP synthase F1 subunit delta(ATP5F1D)                        |
| P30050 | ribosomal protein L12(RPL12)                                  |
| P30084 | enoyl-CoA hydratase, short chain 1(ECHS1)                     |

|        |                                                                                          |
|--------|------------------------------------------------------------------------------------------|
| P30085 | cytidine/uridine monophosphate kinase 1(CMPK1)                                           |
| P30086 | phosphatidylethanolamine binding protein 1(PEBP1)                                        |
| P30101 | protein disulfide isomerase family A member 3(PDIA3)                                     |
| P30153 | protein phosphatase 2 scaffold subunit Aalpha(PPP2R1A)                                   |
| P30419 | N-myristoyltransferase 1(NMT1)                                                           |
| P30626 | sorcin(SRI)                                                                              |
| P30740 | serpin family B member 1(SERPINB1)                                                       |
| P30837 | aldehyde dehydrogenase 1 family member B1(ALDH1B1)                                       |
| P31040 | succinate dehydrogenase complex flavoprotein subunit A(SDHA)                             |
| P31146 | coronin 1A(CORO1A)                                                                       |
| P31150 | GDP dissociation inhibitor 1(GDI1)                                                       |
| P31153 | methionine adenosyltransferase 2A(MAT2A)                                                 |
| P31930 | ubiquinol-cytochrome c reductase core protein 1(UQCRC1)                                  |
| P31937 | 3-hydroxyisobutyrate dehydrogenase(HIBADH)                                               |
| P31939 | 5-aminoimidazole-4-carboxamide ribonucleotide formyltransferase/IMP cyclohydrolase(ATIC) |
| P31942 | heterogeneous nuclear ribonucleoprotein H3(HNRNPH3)                                      |
| P31943 | heterogeneous nuclear ribonucleoprotein H1(HNRNPH1)                                      |
| P31946 | tyrosine 3-monooxygenase/tryptophan 5-monooxygenase activation protein beta(YWHAB)       |
| P31947 | stratifin(SFN)                                                                           |
| P31948 | stress induced phosphoprotein 1(STIP1)                                                   |
| P31949 | S100 calcium binding protein A11(S100A11)                                                |
| P32119 | peroxiredoxin 2(PRDX2)                                                                   |
| P32455 | guanylate binding protein 1(GBP1)                                                        |
| P33176 | kinesin family member 5B(KIF5B)                                                          |
| P33240 | cleavage stimulation factor subunit 2(CSTF2)                                             |
| P33316 | deoxyuridine triphosphatase(DUT)                                                         |
| P33778 | H2B clustered histone 3(H2BC3)                                                           |



|        |                                                        |
|--------|--------------------------------------------------------|
| P34897 | serine hydroxymethyltransferase 2(SHMT2)               |
| P34932 | heat shock protein family A (Hsp70) member 4(HSPA4)    |
| P35080 | profilin 2(PFN2)                                       |
| P35221 | catenin alpha 1(CTNNA1)                                |
| P35222 | catenin beta 1(CTNNB1)                                 |
| P35232 | prohibitin 1(PHB1)                                     |
| P35237 | serpin family B member 6(SERPINB6)                     |
| P35268 | ribosomal protein L22(RPL22)                           |
| P35270 | sepiapterin reductase(SPR)                             |
| P35503 | UDP glucuronosyltransferase family 1 member A3(UGT1A3) |
| P35504 | UDP glucuronosyltransferase family 1 member A5(UGT1A5) |
| P35527 | keratin 9(KRT9)                                        |
| P35555 | fibrillin 1(FBN1)                                      |
| P35579 | myosin heavy chain 9(MYH9)                             |
| P35606 | COPI coat complex subunit beta 2(COPB2)                |
| P35611 | adducin 1(ADD1)                                        |
| P35613 | basigin (Ok blood group)(BSG)                          |
| P35637 | FUS RNA binding protein(FUS)                           |
| P35659 | DEK proto-oncogene(DEK)                                |
| P35749 | myosin heavy chain 11(MYH11)                           |
| P35900 | keratin 20(KRT20)                                      |
| P35908 | keratin 2(KRT2)                                        |
| P35914 | 3-hydroxy-3-methylglutaryl-CoA lyase(HMGCL)            |
| P35998 | proteasome 26S subunit, ATPase 2(PSMC2)                |
| P36269 | gamma-glutamyltransferase 5(GGT5)                      |
| P36542 | ATP synthase F1 subunit gamma(ATP5F1C)                 |
| P36578 | ribosomal protein L4(RPL4)                             |
| P36871 | phosphoglucomutase 1(PGM1)                             |

|        |                                                                                             |
|--------|---------------------------------------------------------------------------------------------|
| P36873 | protein phosphatase 1 catalytic subunit gamma(PPP1CC)                                       |
| P36957 | dihydrolipoamide S-succinyltransferase(DLST)                                                |
| P37059 | hydroxysteroid 17-beta dehydrogenase 2(HSD17B2)                                             |
| P37802 | transgelin 2(TAGLN2)                                                                        |
| P37837 | transaldolase 1(TALDO1)                                                                     |
| P38117 | electron transfer flavoprotein subunit beta(ETFB)                                           |
| P38159 | RNA binding motif protein X-linked(RBMX)                                                    |
| P38606 | ATPase H <sup>+</sup> transporting V1 subunit A(ATP6V1A)                                    |
| P38646 | heat shock protein family A (Hsp70) member 9(HSPA9)                                         |
| P38919 | eukaryotic translation initiation factor 4A3(EIF4A3)                                        |
| P39019 | ribosomal protein S19(RPS19)                                                                |
| P39023 | ribosomal protein L3(RPL3)                                                                  |
| P39656 | dolichyl-diphosphooligosaccharide--protein glycosyltransferase non-catalytic subunit(DDOST) |
| P39687 | acidic nuclear phosphoprotein 32 family member A(ANP32A)                                    |
| P40121 | capping actin protein, gelsolin like(CAPG)                                                  |
| P40227 | chaperonin containing TCP1 subunit 6A(CCT6A)                                                |
| P40306 | proteasome 20S subunit beta 10(PSMB10)                                                      |
| P40429 | ribosomal protein L13a(RPL13A)                                                              |
| P40616 | ADP ribosylation factor like GTPase 1(ARL1)                                                 |
| P40763 | signal transducer and activator of transcription 3(STAT3)                                   |
| P40925 | malate dehydrogenase 1(MDH1)                                                                |
| P40926 | malate dehydrogenase 2(MDH2)                                                                |
| P40939 | hydroxyacyl-CoA dehydrogenase trifunctional multienzyme complex subunit alpha(HADHA)        |
| P41091 | eukaryotic translation initiation factor 2 subunit gamma(EIF2S3)                            |
| P41250 | glycyl-tRNA synthetase 1(GARS1)                                                             |
| P42126 | enoyl-CoA delta isomerase 1(ECI1)                                                           |
| P42166 | thymopoietin(TMPO)                                                                          |

|        |                                                                              |
|--------|------------------------------------------------------------------------------|
| P42167 | thymopoietin(TMPO)                                                           |
| P42224 | signal transducer and activator of transcription 1(STAT1)                    |
| P42330 | aldo-keto reductase family 1 member C3(AKR1C3)                               |
| P42574 | caspase 3(CASP3)                                                             |
| P42677 | ribosomal protein S27(RPS27)                                                 |
| P42704 | leucine rich pentatricopeptide repeat containing(LRPPRC)                     |
| P42765 | acetyl-CoA acyltransferase 2(ACAA2)                                          |
| P43034 | platelet activating factor acetylhydrolase 1b regulatory subunit 1(PAFAH1B1) |
| P43121 | melanoma cell adhesion molecule(MCAM)                                        |
| P43155 | carnitine O-acetyltransferase(CRAT)                                          |
| P43243 | matrin 3(MATR3)                                                              |
| P43304 | glycerol-3-phosphate dehydrogenase 2(GPD2)                                   |
| P43307 | signal sequence receptor subunit 1(SSR1)                                     |
| P43487 | RAN binding protein 1(RANBP1)                                                |
| P43490 | nicotinamide phosphoribosyltransferase(NAMPT)                                |
| P43686 | proteasome 26S subunit, ATPase 4(PSMC4)                                      |
| P43897 | Ts translation elongation factor, mitochondrial(TSFM)                        |
| P45880 | voltage dependent anion channel 2(VDAC2)                                     |
| P45954 | acyl-CoA dehydrogenase short/branched chain(ACADSB)                          |
| P45974 | ubiquitin specific peptidase 5(USP5)                                         |
| P46439 | glutathione S-transferase mu 5(GSTM5)                                        |
| P46459 | N-ethylmaleimide sensitive factor, vesicle fusing ATPase(NSF)                |
| P46776 | ribosomal protein L27a(RPL27A)                                               |
| P46777 | ribosomal protein L5(RPL5)                                                   |
| P46782 | ribosomal protein S5(RPS5)                                                   |
| P46940 | IQ motif containing GTPase activating protein 1(IQGAP1)                      |
| P46977 | STT3 oligosaccharyltransferase complex catalytic subunit A(STT3A)            |
| P47755 | capping actin protein of muscle Z-line subunit alpha 2(CAPZA2)               |

|        |                                                                             |
|--------|-----------------------------------------------------------------------------|
| P47756 | capping actin protein of muscle Z-line subunit beta(CAPZB)                  |
| P47897 | glutaminyl-tRNA synthetase 1(QARS1)                                         |
| P47914 | ribosomal protein L29(RPL29)                                                |
| P47985 | ubiquinol-cytochrome c reductase, Rieske iron-sulfur polypeptide 1(UQCRFS1) |
| P48047 | ATP synthase peripheral stalk subunit OSCP(ATP5PO)                          |
| P48147 | prolyl endopeptidase(PREP)                                                  |
| P48304 | regenerating family member 1 beta(REG1B)                                    |
| P48444 | archain 1(ARCN1)                                                            |
| P48509 | CD151 molecule (Raph blood group)(CD151)                                    |
| P48637 | glutathione synthetase(GSS)                                                 |
| P48643 | chaperonin containing TCP1 subunit 5(CCT5)                                  |
| P48668 | keratin 6C(KRT6C)                                                           |
| P48735 | isocitrate dehydrogenase (NADP(+)) 2(IDH2)                                  |
| P49006 | MARCKS like 1(MARCKSL1)                                                     |
| P49189 | aldehyde dehydrogenase 9 family member A1(ALDH9A1)                          |
| P49207 | ribosomal protein L34(RPL34)                                                |
| P49257 | lectin, mannose binding 1(LMAN1)                                            |
| P49321 | nuclear autoantigenic sperm protein(NASP)                                   |
| P49327 | fatty acid synthase(FASN)                                                   |
| P49368 | chaperonin containing TCP1 subunit 3(CCT3)                                  |
| P49411 | Tu translation elongation factor, mitochondrial(TUFM)                       |
| P49419 | aldehyde dehydrogenase 7 family member A1(ALDH7A1)                          |
| P49448 | glutamate dehydrogenase 2(GLUD2)                                            |
| P49458 | signal recognition particle 9(SRP9)                                         |
| P49588 | alanyl-tRNA synthetase 1(AARS1)                                             |
| P49590 | histidyl-tRNA synthetase 2, mitochondrial(HARS2)                            |
| P49591 | seryl-tRNA synthetase 1(SARS1)                                              |
| P49720 | proteasome 20S subunit beta 3(PSMB3)                                        |

|        |                                                                             |
|--------|-----------------------------------------------------------------------------|
| P49748 | acyl-CoA dehydrogenase very long chain(ACADVL)                              |
| P49753 | acyl-CoA thioesterase 2(ACOT2)                                              |
| P49755 | transmembrane p24 trafficking protein 10(TMED10)                            |
| P49756 | RNA binding motif protein 25(RBM25)                                         |
| P49821 | NADH:ubiquinone oxidoreductase core subunit V1(NDUFV1)                      |
| P50135 | histamine N-methyltransferase(HNMT)                                         |
| P50213 | isocitrate dehydrogenase (NAD(+)) 3 catalytic subunit alpha(IDH3A)          |
| P50395 | GDP dissociation inhibitor 2(GDI2)                                          |
| P50416 | carnitine palmitoyltransferase 1A(CPT1A)                                    |
| P50454 | serpin family H member 1(SERPINH1)                                          |
| P50502 | ST13 Hsp70 interacting protein(ST13)                                        |
| P50552 | vasodilator stimulated phosphoprotein(VASP)                                 |
| P50570 | dynamin 2(DNM2)                                                             |
| P50897 | palmitoyl-protein thioesterase 1(PPT1)                                      |
| P50914 | ribosomal protein L14(RPL14)                                                |
| P50990 | chaperonin containing TCP1 subunit 8(CCT8)                                  |
| P50991 | chaperonin containing TCP1 subunit 4(CCT4)                                  |
| P50993 | ATPase Na <sup>+</sup> /K <sup>+</sup> transporting subunit alpha 2(ATP1A2) |
| P50995 | annexin A11(ANXA11)                                                         |
| P51148 | RAB5C, member RAS oncogene family(RAB5C)                                    |
| P51149 | RAB7A, member RAS oncogene family(RAB7A)                                    |
| P51159 | RAB27A, member RAS oncogene family(RAB27A)                                  |
| P51572 | B cell receptor associated protein 31(BCAP31)                               |
| P51648 | aldehyde dehydrogenase 3 family member A2(ALDH3A2)                          |
| P51659 | hydroxysteroid 17-beta dehydrogenase 4(HSD17B4)                             |
| P51665 | proteasome 26S subunit, non-ATPase 7(PSMD7)                                 |
| P51812 | ribosomal protein S6 kinase A3(RPS6KA3)                                     |
| P51858 | heparin binding growth factor(HDGF)                                         |

|        |                                                                                     |
|--------|-------------------------------------------------------------------------------------|
| P51884 | lumican(LUM)                                                                        |
| P51991 | heterogeneous nuclear ribonucleoprotein A3(HNRNPA3)                                 |
| P52209 | phosphogluconate dehydrogenase(PGD)                                                 |
| P52272 | heterogeneous nuclear ribonucleoprotein M(HNRNPM)                                   |
| P52306 | Rap1 GTPase-GDP dissociation stimulator 1(RAP1GDS1)                                 |
| P52565 | Rho GDP dissociation inhibitor alpha(ARHGDIA)                                       |
| P52566 | Rho GDP dissociation inhibitor beta(ARHGDIB)                                        |
| P52597 | heterogeneous nuclear ribonucleoprotein F(HNRNPF)                                   |
| P52789 | hexokinase 2(HK2)                                                                   |
| P52815 | mitochondrial ribosomal protein L12(MRPL12)                                         |
| P52895 | aldo-keto reductase family 1 member C2(AKR1C2)                                      |
| P52907 | capping actin protein of muscle Z-line subunit alpha 1(CAPZA1)                      |
| P53367 | ADP ribosylation factor interacting protein 1(ARFIP1)                               |
| P53597 | succinate-CoA ligase GDP/ADP-forming subunit alpha(SUCLG1)                          |
| P53618 | COPI coat complex subunit beta 1(COPB1)                                             |
| P53621 | COPI coat complex subunit alpha(COPA)                                               |
| P53634 | cathepsin C(CTSC)                                                                   |
| P54136 | arginyl-tRNA synthetase 1(RARS1)                                                    |
| P54652 | heat shock protein family A (Hsp70) member 2(HSPA2)                                 |
| P54727 | RAD23 homolog B, nucleotide excision repair protein(RAD23B)                         |
| P54819 | adenylate kinase 2(AK2)                                                             |
| P54868 | 3-hydroxy-3-methylglutaryl-CoA synthase 2(HMGCS2)                                   |
| P54886 | aldehyde dehydrogenase 18 family member A1(ALDH18A1)                                |
| P55010 | eukaryotic translation initiation factor 5(EIF5)                                    |
| P55011 | solute carrier family 12 member 2(SLC12A2)                                          |
| P55072 | valosin containing protein(VCP)                                                     |
| P55084 | hydroxyacyl-CoA dehydrogenase trifunctional multienzyme complex subunit beta(HADHB) |
| P55145 | mesencephalic astrocyte derived neurotrophic factor(MANF)                           |

|        |                                                             |
|--------|-------------------------------------------------------------|
| P55209 | nucleosome assembly protein 1 like 1(NAP1L1)                |
| P55265 | adenosine deaminase RNA specific(ADAR)                      |
| P55290 | cadherin 13(CDH13)                                          |
| P55327 | tumor protein D52(TPD52)                                    |
| P55769 | small nuclear ribonucleoprotein 13(SNU13)                   |
| P55786 | aminopeptidase puromycin sensitive(NPEPPS)                  |
| P55795 | heterogeneous nuclear ribonucleoprotein H2(HNRNPH2)         |
| P55809 | 3-oxoacid CoA-transferase 1(OXCT1)                          |
| P55854 | small ubiquitin like modifier 3(SUMO3)                      |
| P55884 | eukaryotic translation initiation factor 3 subunit B(EIF3B) |
| P56134 | ATP synthase membrane subunit f(ATP5MF)                     |
| P56199 | integrin subunit alpha 1(ITGA1)                             |
| P56385 | ATP synthase membrane subunit e(ATP5ME)                     |
| P56470 | galectin 4(LGALS4)                                          |
| P56537 | eukaryotic translation initiation factor 6(EIF6)            |
| P56545 | C-terminal binding protein 2(CTBP2)                         |
| P57053 | H2B clustered histone 12 like(H2BC12L)                      |
| P57088 | transmembrane protein 33(TMEMP33)                           |
| P57737 | coronin 7(CORO7)                                            |
| P58107 | epiplakin 1(EPPK1)                                          |
| P58335 | ANTXR cell adhesion molecule 2(ANTXR2)                      |
| P58546 | myotrophin(MTPN)                                            |
| P58876 | H2B clustered histone 5(H2BC5)                              |
| P59665 | defensin alpha 1(DEFA1)                                     |
| P59665 | defensin alpha 1B(DEFA1B)                                   |
| P59666 | defensin alpha 3(DEFA3)                                     |
| P59998 | actin related protein 2/3 complex subunit 4(ARPC4)          |
| P60033 | CD81 molecule(CD81)                                         |

|        |                                                             |
|--------|-------------------------------------------------------------|
| P60174 | triosephosphate isomerase 1(TPI1)                           |
| P60228 | eukaryotic translation initiation factor 3 subunit E(EIF3E) |
| P60468 | SEC61 translocon subunit beta(SEC61B)                       |
| P60660 | myosin light chain 6(MYL6)                                  |
| P60709 | actin beta(ACTB)                                            |
| P60712 | actin beta(ACTB)                                            |
| P60763 | Rac family small GTPase 3(RAC3)                             |
| P60842 | eukaryotic translation initiation factor 4A1(EIF4A1)        |
| P60866 | ribosomal protein S20(RPS20)                                |
| P60891 | phosphoribosyl pyrophosphate synthetase 1(PRPS1)            |
| P60900 | proteasome 20S subunit alpha 6(PSMA6)                       |
| P60903 | S100 calcium binding protein A10(S100A10)                   |
| P60953 | cell division cycle 42(CDC42)                               |
| P60981 | destrin, actin depolymerizing factor(DSTN)                  |
| P60983 | glia maturation factor beta(GMFB)                           |
| P61006 | RAB8A, member RAS oncogene family(RAB8A)                    |
| P61019 | RAB2A, member RAS oncogene family(RAB2A)                    |
| P61026 | RAB10, member RAS oncogene family(RAB10)                    |
| P61088 | ubiquitin conjugating enzyme E2 N(UBE2N)                    |
| P61106 | RAB14, member RAS oncogene family(RAB14)                    |
| P61158 | actin related protein 3(ACTR3)                              |
| P61160 | actin related protein 2(ACTR2)                              |
| P61204 | ADP ribosylation factor 3(ARF3)                             |
| P61221 | ATP binding cassette subfamily E member 1(ABCE1)            |
| P61224 | RAP1B, member of RAS oncogene family(RAP1B)                 |
| P61247 | ribosomal protein S3A(RPS3A)                                |
| P61254 | ribosomal protein L26(RPL26)                                |
| P61313 | ribosomal protein L15(RPL15)                                |



|        |                                                                                       |
|--------|---------------------------------------------------------------------------------------|
| P61513 | ribosomal protein L37a(RPL37A)                                                        |
| P61586 | ras homolog family member A(RHOA)                                                     |
| P61604 | heat shock protein family E (Hsp10) member 1(HSPE1)                                   |
| P61619 | SEC61 translocon subunit alpha 1(SEC61A1)                                             |
| P61769 | beta-2-microglobulin(B2M)                                                             |
| P61803 | defender against cell death 1(DAD1)                                                   |
| P61916 | NPC intracellular cholesterol transporter 2(NPC2)                                     |
| P61956 | small ubiquitin like modifier 2(SUMO2)                                                |
| P61978 | heterogeneous nuclear ribonucleoprotein K(HNRNPK)                                     |
| P61981 | tyrosine 3-monooxygenase/tryptophan 5-monooxygenase activation protein gamma(YWHAG)   |
| P62081 | ribosomal protein S7(RPS7)                                                            |
| P62136 | protein phosphatase 1 catalytic subunit alpha(PPP1CA)                                 |
| P62140 | protein phosphatase 1 catalytic subunit beta(PPP1CB)                                  |
| P62191 | proteasome 26S subunit, ATPase 1(PSMC1)                                               |
| P62195 | proteasome 26S subunit, ATPase 5(PSMC5)                                               |
| P62241 | ribosomal protein S8(RPS8)                                                            |
| P62244 | ribosomal protein S15a(RPS15A)                                                        |
| P62249 | ribosomal protein S16(RPS16)                                                          |
| P62258 | tyrosine 3-monooxygenase/tryptophan 5-monooxygenase activation protein epsilon(YWHAЕ) |
| P62263 | ribosomal protein S14(RPS14)                                                          |
| P62266 | ribosomal protein S23(RPS23)                                                          |
| P62269 | ribosomal protein S18(RPS18)                                                          |
| P62277 | ribosomal protein S13(RPS13)                                                          |
| P62280 | ribosomal protein S11(RPS11)                                                          |
| P62306 | small nuclear ribonucleoprotein polypeptide F(SNRPF)                                  |
| P62308 | small nuclear ribonucleoprotein polypeptide G(SNRPG)                                  |
| P62316 | small nuclear ribonucleoprotein D2 polypeptide(SNRPD2)                                |

|        |                                                          |
|--------|----------------------------------------------------------|
| P62318 | small nuclear ribonucleoprotein D3 polypeptide(SNRPD3)   |
| P62328 | thymosin beta 4 X-linked(TMSB4X)                         |
| P62333 | proteasome 26S subunit, ATPase 6(PSMC6)                  |
| P62424 | ribosomal protein L7a(RPL7A)                             |
| P62491 | RAB11A, member RAS oncogene family(RAB11A)               |
| P62633 | CCHC-type zinc finger nucleic acid binding protein(CNBP) |
| P62701 | ribosomal protein S4 X-linked(RPS4X)                     |
| P62736 | actin alpha 2, smooth muscle(ACTA2)                      |
| P62750 | ribosomal protein L23a(RPL23A)                           |
| P62753 | ribosomal protein S6(RPS6)                               |
| P62805 | H4 histone 16(H4C16)                                     |
| P62805 | H4 clustered histone 15(H4C15)                           |
| P62805 | H4 clustered histone 9(H4C9)                             |
| P62805 | H4 clustered histone 1(H4C1)                             |
| P62805 | H4 clustered histone 4(H4C4)                             |
| P62805 | H4 clustered histone 6(H4C6)                             |
| P62805 | H4 clustered histone 12(H4C12)                           |
| P62805 | H4 clustered histone 11(H4C11)                           |
| P62805 | H4 clustered histone 3(H4C3)                             |
| P62805 | H4 clustered histone 8(H4C8)                             |
| P62805 | H4 clustered histone 2(H4C2)                             |
| P62805 | H4 clustered histone 5(H4C5)                             |
| P62805 | H4 clustered histone 13(H4C13)                           |
| P62805 | H4 clustered histone 14(H4C14)                           |
| P62807 | H2B clustered histone 8(H2BC8)                           |
| P62807 | H2B clustered histone 7(H2BC7)                           |
| P62807 | H2B clustered histone 6(H2BC6)                           |
| P62807 | H2B clustered histone 10(H2BC10)                         |

|        |                                                                                    |
|--------|------------------------------------------------------------------------------------|
| P62807 | H2B clustered histone 4(H2BC4)                                                     |
| P62820 | RAB1A, member RAS oncogene family(RAB1A)                                           |
| P62826 | RAN, member RAS oncogene family(RAN)                                               |
| P62829 | ribosomal protein L23(RPL23)                                                       |
| P62834 | RAP1A, member of RAS oncogene family(RAP1A)                                        |
| P62841 | ribosomal protein S15(RPS15)                                                       |
| P62847 | ribosomal protein S24(RPS24)                                                       |
| P62851 | ribosomal protein S25(RPS25)                                                       |
| P62854 | ribosomal protein S26(RPS26)                                                       |
| P62857 | ribosomal protein S28(RPS28)                                                       |
| P62873 | G protein subunit beta 1(GNB1)                                                     |
| P62879 | G protein subunit beta 2(GNB2)                                                     |
| P62888 | ribosomal protein L30(RPL30)                                                       |
| P62899 | ribosomal protein L31(RPL31)                                                       |
| P62906 | ribosomal protein L10a(RPL10A)                                                     |
| P62913 | ribosomal protein L11(RPL11)                                                       |
| P62917 | ribosomal protein L8(RPL8)                                                         |
| P62937 | peptidylprolyl isomerase A(PPIA)                                                   |
| P62979 | ribosomal protein S27a(RPS27A)                                                     |
| P62987 | ubiquitin A-52 residue ribosomal protein fusion product 1(UBA52)                   |
| P62995 | transformer 2 beta homolog(TRA2B)                                                  |
| P63000 | Rac family small GTPase 1(RAC1)                                                    |
| P63027 | vesicle associated membrane protein 2(VAMP2)                                       |
| P63104 | tyrosine 3-monooxygenase/tryptophan 5-monooxygenase activation protein zeta(YWHAZ) |
| P63151 | protein phosphatase 2 regulatory subunit Balpha(PPP2R2A)                           |
| P63162 | small nuclear ribonucleoprotein polypeptide N(SNRPN)                               |
| P63173 | ribosomal protein L38(RPL38)                                                       |
| P63220 | ribosomal protein S21(RPS21)                                                       |

|        |                                                                             |
|--------|-----------------------------------------------------------------------------|
| P63241 | eukaryotic translation initiation factor 5A(EIF5A)                          |
| P63244 | receptor for activated C kinase 1(RACK1)                                    |
| P63261 | actin gamma 1(ACTG1)                                                        |
| P63267 | actin gamma 2, smooth muscle(ACTG2)                                         |
| P63313 | thymosin beta 10(TMSB10)                                                    |
| P67936 | tropomyosin 4(TPM4)                                                         |
| P67983 | metallothionein-1A(MT1A)                                                    |
| P68032 | actin alpha cardiac muscle 1(ACTC1)                                         |
| P68104 | eukaryotic translation elongation factor 1 alpha 1(EEF1A1)                  |
| P68133 | actin alpha 1, skeletal muscle(ACTA1)                                       |
| P68363 | tubulin alpha 1b(TUBA1B)                                                    |
| P68366 | tubulin alpha 4a(TUBA4A)                                                    |
| P68371 | tubulin beta 4B class IVb(TUBB4B)                                           |
| P68402 | platelet activating factor acetylhydrolase 1b catalytic subunit 2(PAFAH1B2) |
| P68431 | H3 clustered histone 3(H3C3)                                                |
| P68431 | H3 clustered histone 6(H3C6)                                                |
| P68431 | H3 clustered histone 11(H3C11)                                              |
| P68431 | H3 clustered histone 8(H3C8)                                                |
| P68431 | H3 clustered histone 12(H3C12)                                              |
| P68431 | H3 clustered histone 10(H3C10)                                              |
| P68431 | H3 clustered histone 2(H3C2)                                                |
| P68431 | H3 clustered histone 7(H3C7)                                                |
| P68431 | H3 clustered histone 1(H3C1)                                                |
| P68431 | H3 clustered histone 4(H3C4)                                                |
| P68871 | hemoglobin subunit beta(HBB)                                                |
| P69905 | hemoglobin subunit alpha 2(HBA2)                                            |
| P69905 | hemoglobin subunit alpha 1(HBA1)                                            |
| P78371 | chaperonin containing TCP1 subunit 2(CCT2)                                  |

|        |                                                          |
|--------|----------------------------------------------------------|
| P78417 | glutathione S-transferase omega 1(GSTO1)                 |
| P78527 | protein kinase, DNA-activated, catalytic subunit(PRKDC)  |
| P78563 | adenosine deaminase RNA specific B1(ADARB1)              |
| P80297 | metallothionein 1X(MT1X)                                 |
| P80303 | nucleobindin 2(NUCB2)                                    |
| P80365 | hydroxysteroid 11-beta dehydrogenase 2(HSD11B2)          |
| P80723 | brain abundant membrane attached signal protein 1(BASP1) |
| P80748 | immunoglobulin lambda variable 3-21(IGLV3-21)            |
| P82979 | SAP domain containing ribonucleoprotein(SARNP)           |
| P83731 | ribosomal protein L24(RPL24)                             |
| P83881 | ribosomal protein L36a(RPL36A)                           |
| P84077 | ADP ribosylation factor 1(ARF1)                          |
| P84085 | ADP ribosylation factor 5(ARF5)                          |
| P84090 | ERH mRNA splicing and mitosis factor(ERH)                |
| P84098 | ribosomal protein L19(RPL19)                             |
| P84103 | serine and arginine rich splicing factor 3(SRSF3)        |
| P84243 | H3.3 histone A(H3-3A)                                    |
| P84243 | H3.3 histone B(H3-3B)                                    |
| P99999 | cytochrome c, somatic(CYCS)                              |
| Q00005 | protein phosphatase 2 regulatory subunit Bbeta(PPP2R2B)  |
| Q00059 | transcription factor A, mitochondrial(TFAM)              |
| Q00266 | methionine adenosyltransferase 1A(MAT1A)                 |
| Q00325 | solute carrier family 25 member 3(SLC25A3)               |
| Q00341 | high density lipoprotein binding protein(HDLBP)          |
| Q00610 | clathrin heavy chain(CLTC)                               |
| Q00765 | receptor accessory protein 5(REEP5)                      |
| Q00796 | sorbitol dehydrogenase(SORD)                             |
| Q00839 | heterogeneous nuclear ribonucleoprotein U(HNRNPU)        |

|        |                                                                  |
|--------|------------------------------------------------------------------|
| Q01081 | U2 small nuclear RNA auxiliary factor 1(U2AF1)                   |
| Q01082 | spectrin beta, non-erythrocytic 1(SPTBN1)                        |
| Q01105 | SET nuclear proto-oncogene(SET)                                  |
| Q01130 | serine and arginine rich splicing factor 2(SRSF2)                |
| Q01469 | fatty acid binding protein 5(FABP5)                              |
| Q01518 | cyclase associated actin cytoskeleton regulatory protein 1(CAP1) |
| Q01813 | phosphofructokinase, platelet(PFKP)                              |
| Q01814 | ATPase plasma membrane Ca <sup>2+</sup> transporting 2(ATP2B2)   |
| Q01995 | transgelin(TAGLN)                                                |
| Q02218 | oxoglutarate dehydrogenase(OGDH)                                 |
| Q02252 | aldehyde dehydrogenase 6 family member A1(ALDH6A1)               |
| Q02338 | 3-hydroxybutyrate dehydrogenase 1(BDH1)                          |
| Q02388 | collagen type VII alpha 1 chain(COL7A1)                          |
| Q02539 | H1.1 linker histone, cluster member(H1-1)                        |
| Q02543 | ribosomal protein L18a(RPL18A)                                   |
| Q02750 | mitogen-activated protein kinase kinase 1(MAP2K1)                |
| Q02790 | FKBP prolyl isomerase 4(FKBP4)                                   |
| Q02817 | mucin 2, oligomeric mucus/gel-forming(MUC2)                      |
| Q02818 | nucleobindin 1(NUCB1)                                            |
| Q02878 | ribosomal protein L6(RPL6)                                       |
| Q02978 | solute carrier family 25 member 11(SLC25A11)                     |
| Q03113 | G protein subunit alpha 12(GNA12)                                |
| Q03252 | lamin B2(LMNB2)                                                  |
| Q04637 | eukaryotic translation initiation factor 4 gamma 1(EIF4G1)       |
| Q04695 | keratin 17(KRT17)                                                |
| Q04760 | glyoxalase I(GLO1)                                               |
| Q04828 | aldo-keto reductase family 1 member C1(AKR1C1)                   |
| Q04837 | single stranded DNA binding protein 1(SSBP1)                     |

|        |                                                                                   |
|--------|-----------------------------------------------------------------------------------|
| Q04917 | tyrosine 3-monooxygenase/tryptophan 5-monooxygenase activation protein eta(YWHAH) |
| Q05315 | Charcot-Leyden crystal galectin(CLC)                                              |
| Q05682 | caldesmon 1(CALD1)                                                                |
| Q05707 | collagen type XIV alpha 1 chain(COL14A1)                                          |
| Q06033 | inter-alpha-trypsin inhibitor heavy chain 3(ITIH3)                                |
| Q06141 | regenerating family member 3 alpha(REG3A)                                         |
| Q06210 | glutamine--fructose-6-phosphate transaminase 1(GFPT1)                             |
| Q06323 | proteasome activator subunit 1(PSME1)                                             |
| Q06830 | peroxiredoxin 1(PRDX1)                                                            |
| Q07020 | ribosomal protein L18(RPL18)                                                      |
| Q07021 | complement C1q binding protein(C1QBP)                                             |
| Q07065 | cytoskeleton associated protein 4(CKAP4)                                          |
| Q07654 | trefoil factor 3(TFF3)                                                            |
| Q07955 | serine and arginine rich splicing factor 1(SRSF1)                                 |
| Q07960 | Rho GTPase activating protein 1(ARHGAP1)                                          |
| Q08211 | DExH-box helicase 9(DHX9)                                                         |
| Q08380 | galectin 3 binding protein(LGALS3BP)                                              |
| Q08AM6 | VAC14 component of PIKFYVE complex(VAC14)                                         |
| Q09028 | RB binding protein 4, chromatin remodeling factor(RBBP4)                          |
| Q09666 | AHNAK nucleoprotein(AHNAK)                                                        |
| Q0VD83 | apolipoprotein B receptor(APOBR)                                                  |
| Q10713 | peptidase, mitochondrial processing subunit alpha(PMPCA)                          |
| Q12840 | kinesin family member 5A(KIF5A)                                                   |
| Q12864 | cadherin 17(CDH17)                                                                |
| Q12888 | tumor protein p53 binding protein 1(TP53BP1)                                      |
| Q12905 | interleukin enhancer binding factor 2(ILF2)                                       |
| Q12906 | interleukin enhancer binding factor 3(ILF3)                                       |
| Q12907 | lectin, mannose binding 2(LMAN2)                                                  |

|        |                                                                             |
|--------|-----------------------------------------------------------------------------|
| Q12931 | TNF receptor associated protein 1(TRAP1)                                    |
| Q13011 | enoyl-CoA hydratase 1(ECH1)                                                 |
| Q13029 | PR/SET domain 2(PRDM2)                                                      |
| Q13075 | NLR family apoptosis inhibitory protein(NAIP)                               |
| Q13148 | TAR DNA binding protein(TARDBP)                                             |
| Q13151 | heterogeneous nuclear ribonucleoprotein A0(HNRNPA0)                         |
| Q13162 | peroxiredoxin 4(PRDX4)                                                      |
| Q13200 | proteasome 26S subunit ubiquitin receptor, non-ATPase 2(PSMD2)              |
| Q13228 | selenium binding protein 1(SELENBP1)                                        |
| Q13243 | serine and arginine rich splicing factor 5(SRSF5)                           |
| Q13247 | serine and arginine rich splicing factor 6(SRSF6)                           |
| Q13263 | tripartite motif containing 28(TRIM28)                                      |
| Q13283 | G3BP stress granule assembly factor 1(G3BP1)                                |
| Q13310 | poly(A) binding protein cytoplasmic 4(PABPC4)                               |
| Q13363 | C-terminal binding protein 1(CTBP1)                                         |
| Q13404 | ubiquitin conjugating enzyme E2 V1(UBE2V1)                                  |
| Q13409 | dynein cytoplasmic 1 intermediate chain 2(DYNC1I2)                          |
| Q13423 | nicotinamide nucleotide transhydrogenase(NNT)                               |
| Q13510 | N-acylsphingosine amidohydrolase 1(ASAH1)                                   |
| Q13535 | ATR serine/threonine kinase(ATR)                                            |
| Q13547 | histone deacetylase 1(HDAC1)                                                |
| Q13557 | calcium/calmodulin dependent protein kinase II delta(CAMK2D)                |
| Q13630 | GDP-L-fucose synthase(GFUS)                                                 |
| Q13642 | four and a half LIM domains 1(FHL1)                                         |
| Q13733 | ATPase Na <sup>+</sup> /K <sup>+</sup> transporting subunit alpha 4(ATP1A4) |
| Q13765 | nascent polypeptide associated complex subunit alpha(NACA)                  |
| Q13813 | spectrin alpha, non-erythrocytic 1(SPTAN1)                                  |
| Q13838 | DEx D-box helicase 39B(DDX39B)                                              |



|        |                                                                      |
|--------|----------------------------------------------------------------------|
| Q13885 | tubulin beta 2A class IIa(TUBB2A)                                    |
| Q14019 | coactosin like F-actin binding protein 1(COTL1)                      |
| Q14103 | heterogeneous nuclear ribonucleoprotein D(HNRNPD)                    |
| Q14126 | desmoglein 2(DSG2)                                                   |
| Q14152 | eukaryotic translation initiation factor 3 subunit A(EIF3A)          |
| Q14165 | malectin(MLEC)                                                       |
| Q14195 | dihydropyrimidinase like 3(DPYSL3)                                   |
| Q14204 | dynein cytoplasmic 1 heavy chain 1(DYNC1H1)                          |
| Q14240 | eukaryotic translation initiation factor 4A2(EIF4A2)                 |
| Q14247 | cortactin(CTTN)                                                      |
| Q14254 | flotillin 2(FLOT2)                                                   |
| Q14258 | tripartite motif containing 25(TRIM25)                               |
| Q14315 | filamin C(FLNC)                                                      |
| Q14344 | G protein subunit alpha 13(GNA13)                                    |
| Q14508 | WAP four-disulfide core domain 2(WFDC2)                              |
| Q14651 | plastin 1(PLS1)                                                      |
| Q14697 | glucosidase II alpha subunit(GANAB)                                  |
| Q14764 | major vault protein(MVP)                                             |
| Q14847 | LIM and SH3 protein 1(LASP1)                                         |
| Q14956 | glycoprotein nmb(GPNMB)                                              |
| Q14974 | karyopherin subunit beta 1(KPNB1)                                    |
| Q14980 | nuclear mitotic apparatus protein 1(NUMA1)                           |
| Q149M9 | NACHT and WD repeat domain containing 1(NWD1)                        |
| Q14CN4 | keratin 72(KRT72)                                                    |
| Q15019 | septin 2(SEPTIN2)                                                    |
| Q15029 | elongation factor Tu GTP binding domain containing 2(EFTUD2)         |
| Q15031 | leucyl-tRNA synthetase 2, mitochondrial(LARS2)                       |
| Q15041 | ADP ribosylation factor like GTPase 6 interacting protein 1(ARL6IP1) |

|        |                                                              |
|--------|--------------------------------------------------------------|
| Q15046 | lysyl-tRNA synthetase 1(KARS1)                               |
| Q15058 | kinesin family member 14(KIF14)                              |
| Q15063 | periostin(POSTN)                                             |
| Q15075 | early endosome antigen 1(EEA1)                               |
| Q15084 | protein disulfide isomerase family A member 6(PDIA6)         |
| Q15149 | plectin(PLEC)                                                |
| Q15181 | inorganic pyrophosphatase 1(PPA1)                            |
| Q15185 | prostaglandin E synthase 3(PTGES3)                           |
| Q15233 | non-POU domain containing octamer binding(NONO)              |
| Q15274 | quinolinate phosphoribosyltransferase(QPRT)                  |
| Q15293 | reticulocalbin 1(RCN1)                                       |
| Q15365 | poly(rC) binding protein 1(PCBP1)                            |
| Q15366 | poly(rC) binding protein 2(PCBP2)                            |
| Q15369 | elongin C(ELOC)                                              |
| Q15393 | splicing factor 3b subunit 3(SF3B3)                          |
| Q15417 | calponin 3(CNN3)                                             |
| Q15435 | protein phosphatase 1 regulatory subunit 7(PPP1R7)           |
| Q15436 | SEC23 homolog A, COPII coat complex component(SEC23A)        |
| Q15437 | SEC23 homolog B, COPII coat complex component(SEC23B)        |
| Q15459 | splicing factor 3a subunit 1(SF3A1)                          |
| Q15582 | transforming growth factor beta induced(TGFBI)               |
| Q15637 | splicing factor 1(SF1)                                       |
| Q15661 | tryptase alpha/beta 1(TPSAB1)                                |
| Q15691 | microtubule associated protein RP/EB family member 1(MAPRE1) |
| Q15717 | ELAV like RNA binding protein 1(ELAVL1)                      |
| Q15746 | myosin light chain kinase(MYLK)                              |
| Q15836 | vesicle associated membrane protein 3(VAMP3)                 |
| Q15907 | RAB11B, member RAS oncogene family(RAB11B)                   |

|        |                                                                     |
|--------|---------------------------------------------------------------------|
| Q16134 | electron transfer flavoprotein dehydrogenase(ETFDH)                 |
| Q16181 | septin 7(SEPTIN7)                                                   |
| Q16186 | ADRM1 26S proteasome ubiquitin receptor(ADRM1)                      |
| Q16543 | cell division cycle 37, HSP90 cochaperone(CDC37)                    |
| Q16555 | dihydropyrimidinase like 2(DPYSL2)                                  |
| Q16629 | serine and arginine rich splicing factor 7(SRSF7)                   |
| Q16658 | fascin actin-bundling protein 1(FSCN1)                              |
| Q16695 | H3.4 histone, cluster member(H3-4)                                  |
| Q16698 | 2,4-dienoyl-CoA reductase 1(DECR1)                                  |
| Q16718 | NADH:ubiquinone oxidoreductase subunit A5(NDUFA5)                   |
| Q16762 | thiosulfate sulfurtransferase(TST)                                  |
| Q16774 | guanylate kinase 1(GUK1)                                            |
| Q16777 | H2A clustered histone 20(H2AC20)                                    |
| Q16778 | H2B clustered histone 21(H2BC21)                                    |
| Q16795 | NADH:ubiquinone oxidoreductase subunit A9(NDUFA9)                   |
| Q16822 | phosphoenolpyruvate carboxykinase 2, mitochondrial(PCK2)            |
| Q16836 | hydroxyacyl-CoA dehydrogenase(HADH)                                 |
| Q16851 | UDP-glucose pyrophosphorylase 2(UGP2)                               |
| Q16853 | amine oxidase copper containing 3(AOC3)                             |
| Q16881 | thioredoxin reductase 1(TXNRD1)                                     |
| Q16891 | inner membrane mitochondrial protein(IMMT)                          |
| Q1KMD3 | heterogeneous nuclear ribonucleoprotein U like 2(HNRNPUL2)          |
| Q2NKJ3 | CST telomere replication complex component 1(CTC1)                  |
| Q2VIR3 | eukaryotic translation initiation factor 2 subunit gamma B(EIF2S3B) |
| Q32MZ4 | LRR binding FLII interacting protein 1(LRRFIP1)                     |
| Q32P51 | heterogeneous nuclear ribonucleoprotein A1 like 2(HNRNPA1L2)        |
| Q3B8N2 | galectin 9B(LGALS9B)                                                |
| Q3KQU3 | MAP7 domain containing 1(MAP7D1)                                    |

|        |                                                                                |
|--------|--------------------------------------------------------------------------------|
| Q3LXA3 | triokinase and FMN cyclase(TKFC)                                               |
| Q3TTY5 | keratin 2(Krt2)                                                                |
| Q4G176 | acyl-CoA synthetase family member 3(ACSF3)                                     |
| Q4V328 | GRIP1 associated protein 1(GRIPAP1)                                            |
| Q4VXU2 | poly(A) binding protein cytoplasmic 1 like(PABPC1L)                            |
| Q53EL6 | programmed cell death 4(PDCD4)                                                 |
| Q562R1 | actin beta like 2(ACTBL2)                                                      |
| Q56VL3 | OCIA domain containing 2(OCIAD2)                                               |
| Q58FF3 | heat shock protein 90 beta family member 2, pseudogene(HSP90B2P)               |
| Q5JNZ5 | ribosomal protein S26 pseudogene 11(RPS26P11)                                  |
| Q5JQF8 | poly(A) binding protein cytoplasmic 1 like 2A(PABPC1L2A)                       |
| Q5JQF8 | poly(A) binding protein cytoplasmic 1 like 2B(PABPC1L2B)                       |
| Q5JTD0 | tight junction associated protein 1(TJAP1)                                     |
| Q5JXB2 | ubiquitin conjugating enzyme E2 N like (gene/pseudogene)(UBE2NL)               |
| Q5QNW6 | H2B clustered histone 18(H2BC18)                                               |
| Q5R3I4 | tetratricopeptide repeat domain 38(TTC38)                                      |
| Q5SSJ5 | heterochromatin protein 1 binding protein 3(HP1BP3)                            |
| Q5SZK8 | FRAS1 related extracellular matrix 2(FREM2)                                    |
| Q5T1J5 | coiled-coil-helix-coiled-coil-helix domain containing 2 pseudogene 9(CHCHD2P9) |
| Q5T4S7 | ubiquitin protein ligase E3 component n-recognin 4(UBR4)                       |
| Q5TBC7 | BCL2 like 15(BCL2L15)                                                          |
| Q5U651 | Ras interacting protein 1(RASIP1)                                              |
| Q5VT06 | centrosomal protein 350(CEP350)                                                |
| Q5VT66 | mitochondrial amidoxime reducing component 1(MTARC1)                           |
| Q5VTE0 | eukaryotic translation elongation factor 1 alpha 1 pseudogene 5(EEF1A1P5)      |
| Q5XKE5 | keratin 79(KRT79)                                                              |
| Q5XQN5 | keratin 5(KRT5)                                                                |

|        |                                                               |
|--------|---------------------------------------------------------------|
| Q66LE6 | protein phosphatase 2 regulatory subunit Bdelta(PPP2R2D)      |
| Q6DD88 | atlastin GTPase 3(ATL3)                                       |
| Q6DKI2 | galectin 9C(LGALS9C)                                          |
| Q6EEV6 | small ubiquitin like modifier 4(SUMO4)                        |
| Q6FI13 | H2A clustered histone 18(H2AC18)                              |
| Q6FI13 | H2A clustered histone 19(H2AC19)                              |
| Q6IFZ6 | keratin 77(Krt77)                                             |
| Q6IS14 | eukaryotic translation initiation factor 5A like 1(EIF5AL1)   |
| Q6NVY1 | 3-hydroxyisobutyryl-CoA hydrolase(HIBCH)                      |
| Q6NZI2 | caveolae associated protein 1(CAVIN1)                         |
| Q6P4A8 | phospholipase B domain containing 1(PLBD1)                    |
| Q6P587 | fumarylacetoacetate hydrolase domain containing 1(FAHD1)      |
| Q6P996 | pyridoxal dependent decarboxylase domain containing 1(PDXDC1) |
| Q6PI48 | aspartyl-tRNA synthetase 2, mitochondrial(DARS2)              |
| Q6S8J3 | POTE ankyrin domain family member E(POTEE)                    |
| Q6UWP2 | dehydrogenase/reductase 11(DHRS11)                            |
| Q6UX06 | olfactomedin 4(OLFM4)                                         |
| Q6WRI0 | immunoglobulin superfamily member 10(IGSF10)                  |
| Q6XQN6 | nicotinate phosphoribosyltransferase(NAPRT)                   |
| Q6Y7W6 | GRB10 interacting GYF protein 2(GIGYF2)                       |
| Q6YN16 | hydroxysteroid dehydrogenase like 2(HSDL2)                    |
| Q71DI3 | H3 clustered histone 14(H3C14)                                |
| Q71DI3 | H3 clustered histone 15(H3C15)                                |
| Q71DI3 | H3 clustered histone 13(H3C13)                                |
| Q71U36 | tubulin alpha 1a(TUBA1A)                                      |
| Q71UI9 | H2A.Z variant histone 2(H2AZ2)                                |
| Q71UM5 | ribosomal protein S27 like(RPS27L)                            |
| Q76L83 | ASXL transcriptional regulator 2(ASXL2)                       |

|        |                                                             |
|--------|-------------------------------------------------------------|
| Q7KZF4 | staphylococcal nuclease and tudor domain containing 1(SND1) |
| Q7L1Q6 | basic leucine zipper and W2 domains 1(BZW1)                 |
| Q7L2H7 | eukaryotic translation initiation factor 3 subunit M(EIF3M) |
| Q7L7L0 | H2A clustered histone 25(H2AC25)                            |
| Q7LBR1 | charged multivesicular body protein 1B(CHMP1B)              |
| Q7Z3D6 | D-glutamate cyclase(DGLUCY)                                 |
| Q7Z406 | myosin heavy chain 14(MYH14)                                |
| Q7Z4W1 | dicarbonyl and L-xylulose reductase(DCXR)                   |
| Q7Z794 | keratin 77(KRT77)                                           |
| Q7Z7H5 | transmembrane p24 trafficking protein 4(TMED4)              |
| Q86SE5 | RALY RNA binding protein like(RALYL)                        |
| Q86SE8 | nucleophosmin/nucleoplasmin 2(NPM2)                         |
| Q86SF2 | polypeptide N-acetylgalactosaminyltransferase 7(GALNT7)     |
| Q86TX2 | acyl-CoA thioesterase 1(ACOT1)                              |
| Q86U42 | poly(A) binding protein nuclear 1(PABPN1)                   |
| Q86UP2 | kinectin 1(KTN1)                                            |
| Q86UX7 | FERM domain containing kindlin 3(FERMT3)                    |
| Q86V81 | Aly/REF export factor(ALYREF)                               |
| Q86VP6 | cullin associated and neddylation dissociated 1(CAND1)      |
| Q86WA8 | lon peptidase 2, peroxisomal(LONP2)                         |
| Q86Y07 | VRK serine/threonine kinase 2(VRK2)                         |
| Q86YZ3 | hornerin(HRNR)                                              |
| Q8BGZ7 | keratin 75(Krt75)                                           |
| Q8IUE6 | H2A clustered histone 21(H2AC21)                            |
| Q8IV08 | phospholipase D family member 3(PLD3)                       |
| Q8IVF4 | dynein axonemal heavy chain 10(DNAH10)                      |
| Q8IXS8 | hyccin PI4KA lipid kinase complex subunit 2(HYCC2)          |
| Q8IZL8 | proline, glutamate and leucine rich protein 1(PELP1)        |

|        |                                                                             |
|--------|-----------------------------------------------------------------------------|
| Q8IZP2 | ST13, Hsp70 interacting protein pseudogene 4(ST13P4)                        |
| Q8IZQ1 | WD repeat and FYVE domain containing 3(WDFY3)                               |
| Q8N0X4 | citramalyl-CoA lyase(CLYBL)                                                 |
| Q8N139 | ATP binding cassette subfamily A member 6(ABCA6)                            |
| Q8N163 | cell cycle and apoptosis regulator 2(CCAR2)                                 |
| Q8N1G4 | leucine rich repeat containing 47(LRRC47)                                   |
| Q8N1N4 | keratin 78(KRT78)                                                           |
| Q8N257 | H2B clustered histone 26(H2BC26)                                            |
| Q8N339 | metallothionein 1M(MT1M)                                                    |
| Q8N3J5 | protein phosphatase, Mg <sup>2+</sup> /Mn <sup>2+</sup> dependent 1K(PPM1K) |
| Q8N3R3 | T cell activation inhibitor, mitochondrial(TCAIM)                           |
| Q8N6T7 | sirtuin 6(SIRT6)                                                            |
| Q8N8A2 | ankyrin repeat domain 44(ANKRD44)                                           |
| Q8NBJ7 | sulfatase modifying factor 2(SUMF2)                                         |
| Q8NBS9 | thioredoxin domain containing 5(TXNDC5)                                     |
| Q8NBX0 | saccharopine dehydrogenase (putative)(SCCPDH)                               |
| Q8NC51 | SERPINE1 mRNA binding protein 1(SERBP1)                                     |
| Q8NE62 | choline dehydrogenase(ChDH)                                                 |
| Q8NFF5 | flavin adenine dinucleotide synthetase 1(FLAD1)                             |
| Q8NFI4 | ST13, Hsp70 interacting protein pseudogene 5(ST13P5)                        |
| Q8NFU3 | thiosulfate sulfurtransferase like domain containing 1(TSTD1)               |
| Q8NFV4 | abhydrolase domain containing 11(ABHD11)                                    |
| Q8NFW8 | cytidine monophosphate N-acetylneuraminic acid synthetase(CMAS)             |
| Q8NHP1 | aldo-keto reductase family 7 like (gene/pseudogene)(AKR7L)                  |
| Q8NHW5 | ribosomal protein lateral stalk subunit P0 pseudogene 6(RPLP0P6)            |
| Q8TAA3 | proteasome 20S subunit alpha 8(PSMA8)                                       |
| Q8TC12 | retinol dehydrogenase 11(RDH11)                                             |
| Q8TCD5 | 5', 3'-nucleotidase, cytosolic(NT5C)                                        |

|        |                                                                                   |
|--------|-----------------------------------------------------------------------------------|
| Q8TD06 | anterior gradient 3, protein disulphide isomerase family member(AGR3)             |
| Q8WU39 | marginal zone B and B1 cell specific protein(MZB1)                                |
| Q8WUD1 | RAB2B, member RAS oncogene family(RAB2B)                                          |
| Q8WUM4 | programmed cell death 6 interacting protein(PDCD6IP)                              |
| Q8WWA0 | intelectin 1(ITLN1)                                                               |
| Q8WXD9 | CASK interacting protein 1(CASKIN1)                                               |
| Q8WXF1 | paraspeckle component 1(PSPC1)                                                    |
| Q8WXH0 | spectrin repeat containing nuclear envelope protein 2(SYNE2)                      |
| Q92499 | DEAD-box helicase 1(DDX1)                                                         |
| Q92506 | hydroxysteroid 17-beta dehydrogenase 8(HSD17B8)                                   |
| Q92597 | N-myc downstream regulated 1(NDRG1)                                               |
| Q92616 | GCN1 activator of EIF2AK4(GCN1)                                                   |
| Q92628 | KIAA0232(KIAA0232)                                                                |
| Q92688 | acidic nuclear phosphoprotein 32 family member B(ANP32B)                          |
| Q92769 | histone deacetylase 2(HDAC2)                                                      |
| Q92794 | lysine acetyltransferase 6A(KAT6A)                                                |
| Q92820 | gamma-glutamyl hydrolase(GGH)                                                     |
| Q92841 | DEAD-box helicase 17(DDX17)                                                       |
| Q92859 | neogenin 1(NEO1)                                                                  |
| Q92878 | RAD50 double strand break repair protein(RAD50)                                   |
| Q92896 | golgi glycoprotein 1(GLG1)                                                        |
| Q92928 | RAB1C, member RAS oncogene family pseudogene(RAB1C)                               |
| Q92945 | KH-type splicing regulatory protein(KHSRP)                                        |
| Q92973 | transportin 1(TNPO1)                                                              |
| Q93052 | LIM domain containing preferred translocation partner in lipoma(LPP)              |
| Q93077 | H2A clustered histone 6(H2AC6)                                                    |
| Q93079 | H2B clustered histone 9(H2BC9)                                                    |
| Q93084 | ATPase sarcoplasmic/endoplasmic reticulum Ca <sup>2+</sup> transporting 3(ATP2A3) |



|        |                                                                                 |
|--------|---------------------------------------------------------------------------------|
| Q969H8 | myeloid derived growth factor(MYDGF)                                            |
| Q969Q0 | ribosomal protein L36a like(RPL36AL)                                            |
| Q969Z3 | mitochondrial amidoxime reducing component 2(MTARC2)                            |
| Q96AB3 | isochorismatase domain containing 2(ISOC2)                                      |
| Q96AE4 | far upstream element binding protein 1(FUBP1)                                   |
| Q96BQ1 | FAM3 metabolism regulating signaling molecule D(FAM3D)                          |
| Q96C23 | galactose mutarotase(GALM)                                                      |
| Q96CM8 | acyl-CoA synthetase family member 2(ACSF2)                                      |
| Q96CX2 | potassium channel tetramerization domain containing 12(KCTD12)                  |
| Q96G03 | phosphoglucomutase 2(PGM2)                                                      |
| Q96HE7 | endoplasmic reticulum oxidoreductase 1 alpha(ERO1A)                             |
| Q96HN2 | adenosylhomocysteinase like 2(AHCYL2)                                           |
| Q96HS1 | PGAM family member 5, mitochondrial serine/threonine protein phosphatase(PGAM5) |
| Q96I99 | succinate-CoA ligase GDP-forming subunit beta(SUCLG2)                           |
| Q96IU4 | abhydrolase domain containing 14B(ABHD14B)                                      |
| Q96JN2 | coiled-coil domain containing 136(CCDC136)                                      |
| Q96JQ0 | dachsous cadherin-related 1(DCHS1)                                              |
| Q96JY0 | maelstrom spermatogenic transposon silencer(MAEL)                               |
| Q96KJ4 | mesothelin like(MSLNL)                                                          |
| Q96KK5 | H2A clustered histone 12(H2AC12)                                                |
| Q96KP4 | carnosine dipeptidase 2(CNDP2)                                                  |
| Q96L21 | ribosomal protein L10 like(RPL10L)                                              |
| Q96L93 | kinesin family member 16B(KIF16B)                                               |
| Q96LJ7 | dehydrogenase/reductase 1(DHRS1)                                                |
| Q96M69 | leucine rich repeats and guanylate kinase domain containing(LRGUK)              |
| Q96N66 | membrane bound O-acyltransferase domain containing 7(MBOAT7)                    |
| Q96P70 | importin 9(IPO9)                                                                |
| Q96PK6 | RNA binding motif protein 14(RBM14)                                             |

|        |                                                             |
|--------|-------------------------------------------------------------|
| Q96QK1 | VPS35 retromer complex component(VPS35)                     |
| Q96QS3 | aristaless related homeobox(ARX)                            |
| Q96QV6 | H2A clustered histone 1(H2AC1)                              |
| Q96RQ3 | methylcrotonyl-CoA carboxylase subunit 1(MCCC1)             |
| Q96RY5 | cramped chromatin regulator homolog 1(CRAMP1)               |
| Q96S21 | RAB40C, member RAS oncogene family(RAB40C)                  |
| Q96TA1 | niban apoptosis regulator 2(NIBAN2)                         |
| Q99436 | proteasome 20S subunit beta 7(PSMB7)                        |
| Q99460 | proteasome 26S subunit, non-ATPase 1(PSMD1)                 |
| Q99497 | Parkinsonism associated deglycase(PARK7)                    |
| Q99536 | vesicle amine transport 1(VAT1)                             |
| Q99598 | translin associated factor X(TSNAX)                         |
| Q99613 | eukaryotic translation initiation factor 3 subunit C(EIF3C) |
| Q99623 | prohibitin 2(PHB2)                                          |
| Q99714 | hydroxysteroid 17-beta dehydrogenase 10(HSD17B10)           |
| Q99729 | heterogeneous nuclear ribonucleoprotein A/B(HNRNPAB)        |
| Q99733 | nucleosome assembly protein 1 like 4(NAP1L4)                |
| Q99735 | microsomal glutathione S-transferase 2(MGST2)               |
| Q99757 | thioredoxin 2(TXN2)                                         |
| Q99795 | glycoprotein A33(GPA33)                                     |
| Q99798 | aconitase 2(ACO2)                                           |
| Q99829 | copine 1(CPNE1)                                             |
| Q99832 | chaperonin containing TCP1 subunit 7(CCT7)                  |
| Q99877 | H2B clustered histone 15(H2BC15)                            |
| Q99879 | H2B clustered histone 14(H2BC14)                            |
| Q99880 | H2B clustered histone 13(H2BC13)                            |
| Q99933 | BAG cochaperone 1(BAG1)                                     |
| Q9BPW8 | nipsnap homolog 1(NIPSNAP1)                                 |

|        |                                                                             |
|--------|-----------------------------------------------------------------------------|
| Q9BPX5 | actin related protein 2/3 complex subunit 5 like(ARPC5L)                    |
| Q9BQ69 | mono-ADP ribosylhydrolase 1(MACROD1)                                        |
| Q9BQE3 | tubulin alpha 1c(TUBA1C)                                                    |
| Q9BR76 | coronin 1B(CORO1B)                                                          |
| Q9BRA2 | thioredoxin domain containing 17(TXNDC17)                                   |
| Q9BRL6 | serine and arginine rich splicing factor 8(SRSF8)                           |
| Q9BRP8 | PYM homolog 1, exon junction complex associated factor(PYM1)                |
| Q9BS26 | endoplasmic reticulum protein 44(ERP44)                                     |
| Q9BSH4 | translational activator of cytochrome c oxidase I(TACO1)                    |
| Q9BSH5 | haloacid dehalogenase like hydrolase domain containing 3(HDHD3)             |
| Q9BSJ8 | extended synaptotagmin 1(ESYT1)                                             |
| Q9BTM1 | H2A.J histone(H2AJ)                                                         |
| Q9BUF5 | tubulin beta 6 class V(TUBB6)                                               |
| Q9BUJ2 | heterogeneous nuclear ribonucleoprotein U like 1(HNRNPUL1)                  |
| Q9BUT1 | 3-hydroxybutyrate dehydrogenase 2(BDH2)                                     |
| Q9BV35 | solute carrier family 25 member 23(SLC25A23)                                |
| Q9BVA1 | tubulin beta 2B class IIb(TUBB2B)                                           |
| Q9BVC6 | transmembrane protein 109(TMEM109)                                          |
| Q9BVK6 | transmembrane p24 trafficking protein 9(TMED9)                              |
| Q9BX68 | histidine triad nucleotide binding protein 2(HINT2)                         |
| Q9BXW7 | haloacid dehalogenase like hydrolase domain containing 5(HDHD5)             |
| Q9BYX7 | POTE ankyrin domain family member K, pseudogene(POTEKP)                     |
| Q9BZJ3 | tryptase delta 1(TPSD1)                                                     |
| Q9BZZ5 | apoptosis inhibitor 5(API5)                                                 |
| Q9C0B6 | BMP/retinoic acid inducible neural specific 2(BRINP2)                       |
| Q9GZT3 | SRA stem-loop interacting RNA binding protein(SLIRP)                        |
| Q9GZV4 | eukaryotic translation initiation factor 5A2(EIF5A2)                        |
| Q9H008 | phospholysine phosphohistidine inorganic pyrophosphate<br>phosphatase(LHPP) |

|        |                                                                       |
|--------|-----------------------------------------------------------------------|
| Q9H0C2 | solute carrier family 25 member 31(SLC25A31)                          |
| Q9H0U4 | RAB1B, member RAS oncogene family(RAB1B)                              |
| Q9H1E3 | nuclear casein kinase and cyclin dependent kinase substrate 1(NUCKS1) |
| Q9H223 | EH domain containing 4(EHD4)                                          |
| Q9H299 | SH3 domain binding glutamate rich protein like 3(SH3BGRL3)            |
| Q9H2G2 | STE20 like kinase(SLK)                                                |
| Q9H2U2 | inorganic pyrophosphatase 2(PPA2)                                     |
| Q9H361 | poly(A) binding protein cytoplasmic 3(PABPC3)                         |
| Q9H3P7 | acyl-CoA binding domain containing 3(ACBD3)                           |
| Q9H444 | charged multivesicular body protein 4B(CHMP4B)                        |
| Q9H4A4 | arginyl aminopeptidase(RNPEP)                                         |
| Q9H4B7 | tubulin beta 1 class VI(TUBB1)                                        |
| Q9H4G4 | GLI pathogenesis related 2(GLIPR2)                                    |
| Q9H4M9 | EH domain containing 1(EHD1)                                          |
| Q9H6E5 | terminal uridylyl transferase 1, U6 snRNA-specific(TUT1)              |
| Q9H7P9 | pleckstrin homology and RhoGEF domain containing G2(PLEKHG2)          |
| Q9H7Z3 | NRDE-2, necessary for RNA interference, domain containing(NRDE2)      |
| Q9H8H3 | methyltransferase like 7A(METTL7A)                                    |
| Q9H9B4 | sideroflexin 1(SFXN1)                                                 |
| Q9HAV0 | G protein subunit beta 4(GNB4)                                        |
| Q9HAW7 | UDP glucuronosyltransferase family 1 member A7(UGT1A7)                |
| Q9HAW8 | UDP glucuronosyltransferase family 1 member A10(UGT1A10)              |
| Q9HAW9 | UDP glucuronosyltransferase family 1 member A8(UGT1A8)                |
| Q9HB71 | calcyclin binding protein(CACYBP)                                     |
| Q9HC35 | EMAP like 4(EML4)                                                     |
| Q9HC38 | glyoxalase domain containing 4(GLOD4)                                 |
| Q9HC84 | mucin 5B, oligomeric mucus/gel-forming(MUC5B)                         |
| Q9HCC0 | methylcrotonyl-CoA carboxylase subunit 2(MCCC2)                       |

|        |                                                                 |
|--------|-----------------------------------------------------------------|
| Q9HCJ0 | trinucleotide repeat containing adaptor 6C(TNRC6C)              |
| Q9HCY8 | S100 calcium binding protein A14(S100A14)                       |
| Q9HDC9 | adipocyte plasma membrane associated protein(APMAP)             |
| Q9NPF4 | O-sialoglycoprotein endopeptidase(OSGEP)                        |
| Q9NQR4 | nitrilase family member 2(NIT2)                                 |
| Q9NR28 | diablo IAP-binding mitochondrial protein(DIABLO)                |
| Q9NR31 | secretion associated Ras related GTPase 1A(SAR1A)               |
| Q9NR45 | N-acetylneuraminate synthase(NANS)                              |
| Q9NRV9 | heme binding protein 1(HEBP1)                                   |
| Q9NRX4 | phosphohistidine phosphatase 1(PHPT1)                           |
| Q9NS69 | translocase of outer mitochondrial membrane 22(TOMM22)          |
| Q9NSD9 | phenylalanyl-tRNA synthetase subunit beta(FARSB)                |
| Q9NSE4 | isoleucyl-tRNA synthetase 2, mitochondrial(IARS2)               |
| Q9NSK0 | kinesin light chain 4(KLC4)                                     |
| Q9NTK5 | Obg like ATPase 1(OLA1)                                         |
| Q9NUJ1 | abhydrolase domain containing 10, depalmitoylase(ABHD10)        |
| Q9NUP9 | lin-7 homolog C, crumbs cell polarity complex component(LIN7C)  |
| Q9NUQ9 | CYFIP related Rac1 interactor B(CYRIB)                          |
| Q9NUR3 | transmembrane protein 74B(TMEM74B)                              |
| Q9NVA2 | septin 11(SEPTIN11)                                             |
| Q9NVJ2 | ADP ribosylation factor like GTPase 8B(ARL8B)                   |
| Q9NX63 | coiled-coil-helix-coiled-coil-helix domain containing 3(CHCHD3) |
| Q9NXZ2 | DEAD-box helicase 43(DDX43)                                     |
| Q9NY33 | dipeptidyl peptidase 3(DPP3)                                    |
| Q9NYC9 | dynein axonemal heavy chain 9(DNAH9)                            |
| Q9NYU2 | UDP-glucose glycoprotein glucosyltransferase 1(UGGT1)           |
| Q9NYV4 | cyclin dependent kinase 12(CDK12)                               |
| Q9NZ08 | endoplasmic reticulum aminopeptidase 1(ERAP1)                   |

|        |                                                                    |
|--------|--------------------------------------------------------------------|
| Q9NZ45 | CDGSH iron sulfur domain 1(CISD1)                                  |
| Q9NZB2 | family with sequence similarity 120A(FAM120A)                      |
| Q9NZL9 | methionine adenosyltransferase 2B(MAT2B)                           |
| Q9NZN3 | EH domain containing 3(EHD3)                                       |
| Q9NZN4 | EH domain containing 2(EHD2)                                       |
| Q9NZN5 | Rho guanine nucleotide exchange factor 12(ARHGEF12)                |
| Q9P1U1 | actin related protein 3B(ACTR3B)                                   |
| Q9P225 | dynein axonemal heavy chain 2(DNAH2)                               |
| Q9P241 | ATPase phospholipid transporting 10D (putative)(ATP10D)            |
| Q9P2E9 | ribosome binding protein 1(RRBP1)                                  |
| Q9P2K8 | eukaryotic translation initiation factor 2 alpha kinase 4(EIF2AK4) |
| Q9P2R7 | succinate-CoA ligase ADP-forming subunit beta(SUCLA2)              |
| Q9P2T1 | guanosine monophosphate reductase 2(GMPR2)                         |
| Q9UBE0 | SUMO1 activating enzyme subunit 1(SAE1)                            |
| Q9UBF2 | COPI coat complex subunit gamma 2(COPG2)                           |
| Q9UBI6 | G protein subunit gamma 12(GNG12)                                  |
| Q9UBQ0 | VPS29 retromer complex component(VPS29)                            |
| Q9UBQ7 | glyoxylate and hydroxypyruvate reductase(GRHPR)                    |
| Q9UBR2 | cathepsin Z(CTSZ)                                                  |
| Q9UBS4 | DnaJ heat shock protein family (Hsp40) member B11(DNAJB11)         |
| Q9UBV8 | penta-EF-hand domain containing 1(PEF1)                            |
| Q9UDY2 | tight junction protein 2(TJP2)                                     |
| Q9UFH2 | dynein axonemal heavy chain 17(DNAH17)                             |
| Q9UGM3 | deleted in malignant brain tumors 1(DMBT1)                         |
| Q9UHB6 | LIM domain and actin binding 1(LIMA1)                              |
| Q9UHD8 | septin 9(SEPTIN9)                                                  |
| Q9UII2 | ATP synthase inhibitory factor subunit 1(ATP5IF1)                  |
| Q9UIJ7 | adenylate kinase 3(AK3)                                            |

|        |                                                             |
|--------|-------------------------------------------------------------|
| Q9UJ41 | RAB guanine nucleotide exchange factor 1(RABGEF1)           |
| Q9UJS0 | solute carrier family 25 member 13(SLC25A13)                |
| Q9UJU6 | drebrin like(DBNL)                                          |
| Q9UJX3 | anaphase promoting complex subunit 7(ANAPC7)                |
| Q9UJZ1 | stomatin like 2(STOML2)                                     |
| Q9UKM9 | RALY heterogeneous nuclear ribonucleoprotein(RALY)          |
| Q9UL46 | proteasome activator subunit 2(PSME2)                       |
| Q9UL63 | muskelin 1(MKLN1)                                           |
| Q9ULA0 | aspartyl aminopeptidase(DNPEP)                              |
| Q9ULC5 | acyl-CoA synthetase long chain family member 5(ACSL5)       |
| Q9ULV4 | coronin 1C(CORO1C)                                          |
| Q9ULX5 | ring finger protein 112(RNF112)                             |
| Q9ULZ3 | PYD and CARD domain containing(PYCARD)                      |
| Q9UNH7 | sorting nexin 6(SNX6)                                       |
| Q9UNL2 | signal sequence receptor subunit 3(SSR3)                    |
| Q9UNX3 | ribosomal protein L26 like 1(RPL26L1)                       |
| Q9UNZ2 | NSFL1 cofactor(NSFL1C)                                      |
| Q9UPY3 | dicer 1, ribonuclease III(DICER1)                           |
| Q9UQ80 | proliferation-associated 2G4(PA2G4)                         |
| Q9UQE7 | structural maintenance of chromosomes 3(SMC3)               |
| Q9Y262 | eukaryotic translation initiation factor 3 subunit L(EIF3L) |
| Q9Y265 | RuvB like AAA ATPase 1(RUVBL1)                              |
| Q9Y277 | voltage dependent anion channel 3(VDAC3)                    |
| Q9Y285 | phenylalanyl-tRNA synthetase subunit alpha(FARSA)           |
| Q9Y2A7 | NCK associated protein 1(NCKAP1)                            |
| Q9Y2B0 | canopy FGF signaling regulator 2(CNPY2)                     |
| Q9Y2C9 | toll like receptor 6(TLR6)                                  |
| Q9Y2J8 | peptidyl arginine deiminase 2(PADI2)                        |

|        |                                                                                         |
|--------|-----------------------------------------------------------------------------------------|
| Q9Y2Q3 | glutathione S-transferase kappa 1(GSTK1)                                                |
| Q9Y2Y8 | proteoglycan 3, pro eosinophil major basic protein 2(PRG3)                              |
| Q9Y315 | deoxyribose-phosphate aldolase(DERA)                                                    |
| Q9Y365 | StAR related lipid transfer domain containing 10(STARD10)                               |
| Q9Y3B8 | RNA exonuclease 2(REXO2)                                                                |
| Q9Y3D6 | fission, mitochondrial 1(FIS1)                                                          |
| Q9Y3F4 | serine/threonine kinase receptor associated protein(STRAP)                              |
| Q9Y3U8 | ribosomal protein L36(RPL36)                                                            |
| Q9Y3Z3 | SAM and HD domain containing deoxynucleoside triphosphate triphosphohydrolase 1(SAMHD1) |
| Q9Y490 | talin 1(TLN1)                                                                           |
| Q9Y4F4 | TOG array regulator of axonemal microtubules 1(TOGARAM1)                                |
| Q9Y4L1 | hypoxia up-regulated 1(HYOU1)                                                           |
| Q9Y4P3 | transducin beta like 2(TBL2)                                                            |
| Q9Y4W6 | AFG3 like matrix AAA peptidase subunit 2(AFG3L2)                                        |
| Q9Y512 | SAMM50 sorting and assembly machinery component(SAMM50)                                 |
| Q9Y5L4 | translocase of inner mitochondrial membrane 13(TIMM13)                                  |
| Q9Y5M8 | SRP receptor subunit beta(SRPRB)                                                        |
| Q9Y5P6 | GDP-mannose pyrophosphorylase B(GMPPB)                                                  |
| Q9Y5S9 | RNA binding motif protein 8A(RBM8A)                                                     |
| Q9Y618 | nuclear receptor corepressor 2(NCOR2)                                                   |
| Q9Y678 | COPI coat complex subunit gamma 1(COPG1)                                                |
| Q9Y6B6 | secretion associated Ras related GTPase 1B(SAR1B)                                       |
| Q9Y6E2 | basic leucine zipper and W2 domains 2(BZW2)                                             |
| Q9Y6H1 | coiled-coil-helix-coiled-coil-helix domain containing 2(CHCHD2)                         |
| Q9Y6N5 | sulfide quinone oxidoreductase(SQOR)                                                    |
| Q9Y6R7 | Fc gamma binding protein(FCGBP)                                                         |
| Q9Y6W5 | WASP family member 2(WASF2)                                                             |
